1 **Pervasive Translation in *Mycobacterium tuberculosis***

2

3

4 Carol Smith<sup>1†</sup>, Jill G. Canestrari<sup>1†</sup>, Archer J. Wang<sup>1†‡</sup>, Matthew M. Champion<sup>2</sup>, Keith M. Derbyshire<sup>1,3\*</sup>, Todd A. Gray<sup>1,3\*</sup>,  
5 and Joseph T. Wade<sup>1,3\*</sup>

6

7

8 <sup>1</sup>Wadsworth Center, New York State Department of Health, Albany, New York, USA.

9 <sup>2</sup>Department of Chemistry and Biochemistry, University of Notre Dame, Notre Dame, Indiana, USA

10 <sup>3</sup>Department of Biomedical Sciences, School of Public Health, University at Albany, Albany, New York, USA.

11 <sup>†</sup>Equal author contribution.

12 <sup>‡</sup>Formerly known as Jing Wang.

13

14

15 \*Corresponding authors:

16 joseph.wade@health.ny.gov

17 todd.gray@health.ny.gov

18 keith.derbyshire@health.ny.gov

19 **ABSTRACT**

20

21 Most bacterial ORFs are identified by automated prediction algorithms. However, these algorithms often fail to identify

22 ORFs lacking canonical features such as a length of >50 codons or the presence of an upstream Shine-Dalgarno sequence.

23 Here, we use ribosome profiling approaches to identify actively translated ORFs in *Mycobacterium tuberculosis*. Most of

24 the ORFs we identify have not been previously described, indicating that the *M. tuberculosis* transcriptome is pervasively

25 translated. The newly described ORFs are predominantly short, with many encoding proteins of  $\leq 50$  amino acids. Codon

26 usage of the newly discovered ORFs suggests that most have not been subject to purifying selection, and hence do not

27 contribute to cell fitness. Nevertheless, we identify 90 new ORFs (median length of 52 codons) that bear the hallmarks of

28 purifying selection. Thus, our data suggest that pervasive translation of short ORFs in *Mycobacterium tuberculosis* serves

29 as a rich source for the evolution of new functional proteins.

## 30 INTRODUCTION

31  
32 The canonical mode of bacterial translation initiation begins with the association of a 30S ribosomal subunit, initiator tRNA,  
33 and initiation factors, with the ribosome binding site of an mRNA (Laursen et al., 2005). Binding of the 30S initiation  
34 complex to the mRNA involves base-pairing interactions between the mRNA Shine-Dalgarno (S-D) sequence, located a  
35 short distance upstream of the start codon, and the anti-S-D sequence in the 16S ribosomal RNA (rRNA). Local mRNA  
36 secondary structure around the ribosome binding site can reduce interaction with the 30S initiation complex. Translation  
37 initiates at a start codon, typically an AUG; less frequently, translation initiation occurs at GUG or UUG, and in rare  
38 instances at AUC, AUU, and AUA start codons (Gvozdjak and Samanta, 2020; Hecht et al., 2017). Hence, the likelihood  
39 of translation initiation at a given sequence will depend on the sequence upstream of the start codon, the degree of secondary  
40 structure in the region surrounding the start codon, and start codon identity.

41  
42 Due to the requirement for a 5' untranslated region that includes the S-D sequence, mRNAs translated using the canonical  
43 mechanism are referred to as “leadered”. By contrast, “leaderless” translation initiation occurs on mRNAs that lack a 5'  
44 UTR, such that the transcription start site (TSS) and translation start codon coincide. The mechanism of leaderless  
45 translation initiation is poorly understood. Until recently, there were few known examples of leaderless mRNAs, and  
46 leaderless translation in the model bacterium *Escherichia coli* was shown to be rare and inefficient (Moll et al., 2002;  
47 Romero et al., 2014; Shell et al., 2015). However, recent studies indicate that leaderless translation initiation is a prevalent  
48 and robust mechanism in many bacterial and archaeal species (Beck and Moll, 2018). We and others recently showed that  
49 ~25% of all mRNAs in *Mycobacterium smegmatis* and *Mycobacterium tuberculosis* (*Mtb*) are leaderless (Cortes et al.,  
50 2013; Shell et al., 2015). Moreover, our data suggested that any RNA with a 5' AUG or GUG will be efficiently translated  
51 using the leaderless mechanism in *M. smegmatis* (Shell et al., 2015).

52  
53 Bacterial open reading frames (ORFs) are typically identified from genome sequences using automated prediction  
54 algorithms (Besemer and Borodovsky, 2005; Delcher et al., 2007; Hyatt et al., 2010). Among the criteria used by these  
55 algorithms are ORF length, and the presence of a S-D sequence. Hence, they often fail to identify non-canonical ORFs,  
56 including overlapping ORFs (Burge and Karlin, 1998), leaderless ORFs (Beck and Moll, 2018; Lomsadze et al., 2018), and  
57 short ORFs (sORFs; encoding small proteins of 50 or fewer amino acids; most algorithms have a lower size limit of 50

58 codons). Recent studies have revealed large numbers of sORFs in diverse bacterial species (Orr et al., 2020; Sberro et al.,  
59 2019; Storz et al., 2014; VanOrsdel et al., 2018; Weaver et al., 2019). Some sORFs encode functional small proteins that  
60 contribute to cell fitness, whereas other sORFs function as *cis*-acting regulators. In eukaryotes, there have been reports of  
61 “pervasive translation” of large numbers of unannotated sORFs, likely due to the imperfect specificity of the translation  
62 machinery (Ingolia et al., 2014; Ruiz-Orera et al., 2018; Wacholder et al., 2021). The function, if any, of these sORFs and  
63 their encoded proteins is unclear, although they are rarely subject to purifying selection (Ruiz-Orera et al., 2018; Wacholder  
64 et al., 2021). Nonetheless, pervasively translated eukaryotic sORFs may function as “proto-genes”, that, over the course of  
65 evolution, can acquire a function promoting cell fitness, a process referred to as “de novo gene birth” (Blevins et al., 2021;  
66 Carvunis et al., 2012; Ruiz-Orera et al., 2018; Vakirlis et al., 2018, 2020).

67  
68 Ribosome profiling (Ribo-seq) is a powerful experimental approach to identify the translated regions of mRNAs by mapping  
69 ribosome-protected RNA fragments (Ingolia et al., 2009). Ribo-RET is a modified form of Ribo-seq in which bacterial cells  
70 are treated with the antibiotic retapamulin before lysis; retapamulin traps bacterial ribosomes at sites of translation initiation,  
71 whereas elongating ribosomes are free to complete translation (Meydan et al., 2019). Thus, Ribo-RET facilitates the  
72 identification of overlapping ORFs by limiting the signal to the start codons (Meydan et al., 2018, 2019). Ribo-RET was  
73 recently applied to *E. coli*, revealing start codons for many previously undescribed ORFs (Meydan et al., 2019; Weaver et  
74 al., 2019), including sORFs, and ORFs positioned in frame with annotated ORFs, such that the translated protein is an  
75 isoform of the previously described protein. Here, we use a combination of Ribo-seq and Ribo-RET to map translated ORFs  
76 in *Mtb*. We detect thousands of robustly translated, previously undescribed sORFs from leaderless and leadered mRNAs.  
77 We also identify large numbers of ORFs that have start codons upstream or downstream of those for annotated genes, in the  
78 same reading frame. We conclude that the *Mtb* transcriptome is pervasively translated, with spurious translation initiation  
79 occurring at many sites. We also identify a subset of novel sORFs that appear to be under purifying selection, suggesting  
80 these ORFs, or the proteins they encode, contribute to cell fitness. Thus, our data suggest that pervasive translation of sORFs  
81 encoded by *Mtb* serves as a rich source for the evolution of functional genes.

## 82 RESULTS

### 84 Hundreds of actively translated sORFs from leaderless mRNAs

85 Two previous studies of *Mtb* identified 1,285 transcription start sites (TSSs) for which the associated transcript begins with  
86 the sequence “RUG” (R = A or G; Table S1) (Cortes et al., 2013; Shell et al., 2015), suggesting that these transcripts  
87 correspond to leaderless mRNAs (Shell et al., 2015). Of the 1,285 TSSs associated with a 5’ RUG, 577 match the start  
88 codons of protein-coding genes included in the current genome annotation, as previously noted (Cortes et al., 2013; Shell  
89 et al., 2015). A further 338 of the RUG-associated TSSs correspond to putative ORFs whose start codons are unannotated,  
90 but whose stop codons match those of annotated genes; we refer to this architecture as “isoform”, since translation of these  
91 putative ORFs would generate N-terminal isoforms of annotated proteins. We note that some isoform ORFs likely reflect  
92 mis-annotations, as has been suggested previously (Cortes et al., 2013; Shell et al., 2015). Lastly, 370 of the RUG-associated  
93 1,285 TSSs correspond to putative ORFs whose start and stop codons do not match those of any annotated gene; we refer  
94 to these as putative “novel” ORFs.

95  
96 To determine whether the putative isoform and novel leaderless ORFs are actively translated, we performed Ribo-seq in  
97 *Mtb*. Note that all genome-scale data described in this manuscript can be viewed in our interactive genome browser  
98 (<http://mtb.wadsworth.org/>). We first assessed ribosome occupancy profiles for leadered ORFs that are present in the current  
99 genome annotation. Consistent with previous studies (Oh et al., 2011; Woolstenhulme et al., 2015), we observed enrichment  
100 of ribosome occupancy at start and stop codons of annotated, leadered ORFs; the 3’ ends of ribosome-protected RNA  
101 fragments are enriched 15 nt downstream of the start codons, and 12 nt downstream of stop codons (Figure 1A). We note  
102 that there are also smaller peaks and troughs of Ribo-seq signal precisely at start and stop codons, likely attributable to  
103 sequence biases associated with library preparation (see Methods). We next assessed ribosome occupancy profiles for the  
104 577 leaderless ORFs that are present in the current genome annotation. As expected, we observed an enrichment of  
105 ribosome-protected RNA fragments, with 3’ ends positioned 12 nt downstream of stop codons (Figure 1B), consistent with  
106 the profile observed for leadered ORFs. However, 3’ ends of ribosome-protected RNA fragments were not enriched 15 nt  
107 downstream of the start codons of the 577 annotated leaderless ORFs; rather, we observed enrichment spread across the  
108 region ~25-35 nt downstream of leaderless start codons (Figure 1B), suggesting either that retapamulin does not trap  
109 initiating ribosomes at leaderless ORF start codons, or that ribosome-protected fragments are too small to be represented

# Figure 1

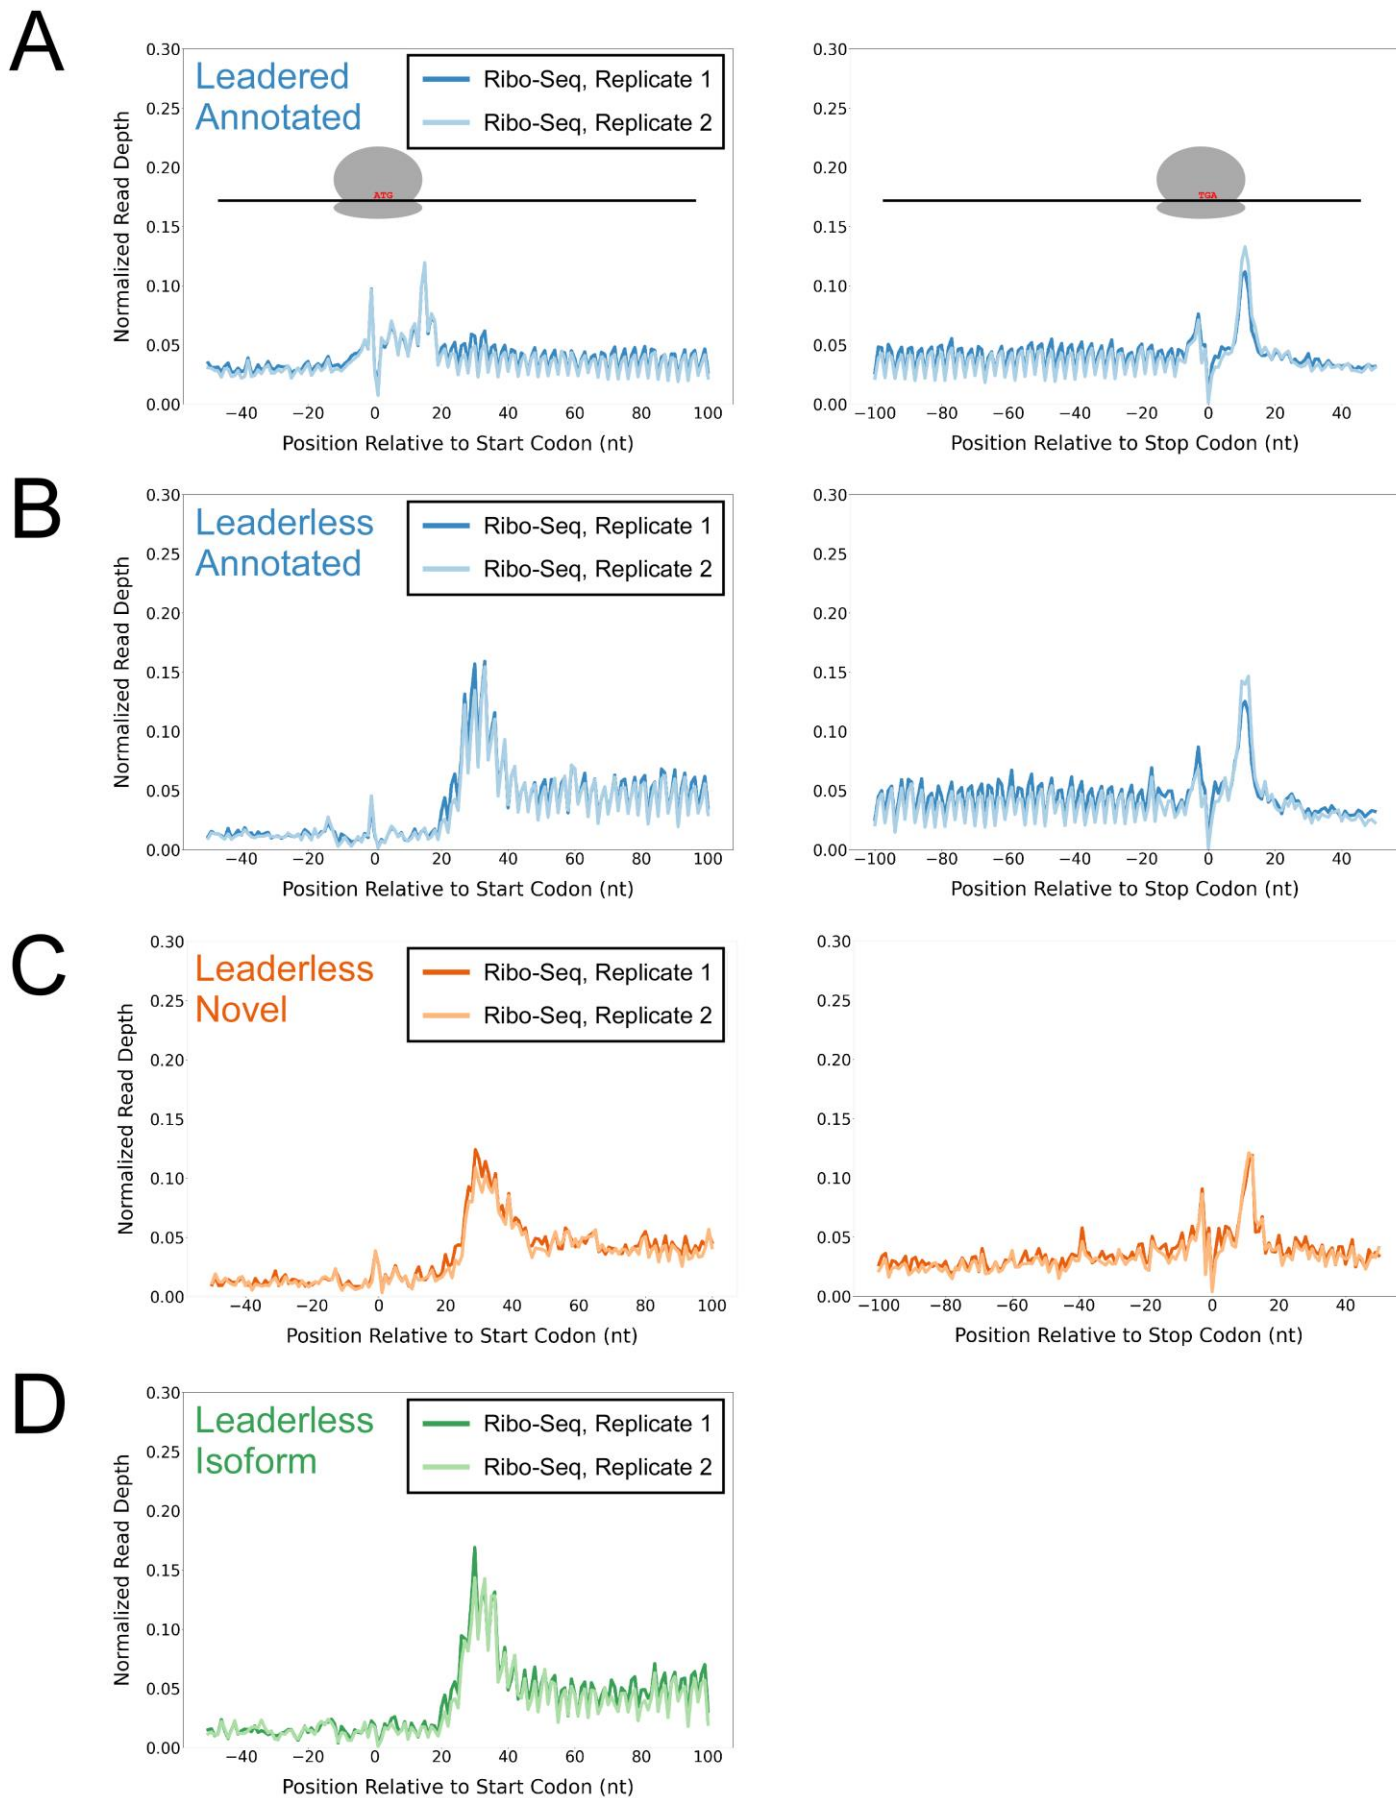

111 **Figure 1. Ribo-seq data support the translation of hundreds of isoform and novel ORFs from leaderless mRNAs.** (A) Metagene plot showing  
112 normalized Ribo-seq sequence read coverage for untreated cells in the regions around start (left graph) and stop codons (right graph) of previously  
113 annotated, leadered ORFs. Note that sequence read coverage is plotted only for the 3' ends of reads, since these are consistently positioned relative to  
114 the ribosome P-site (Woolstenhulme et al., 2015). Data are shown for two biological replicate experiments. The schematics show the position of  
115 initiating/terminating ribosomes, highlighting the expected site of ribosome occupancy enrichment at the downstream edge of the ribosome. (B)  
116 Equivalent data to (A) but for putative annotated, leaderless ORFs. (C) Equivalent data to (A) but for putative novel, leaderless ORFs. (D) Equivalent  
117 data to (A) but for putative isoform, leaderless ORFs. Only data for start codons are shown because the same stop codon is used by both an annotated  
118 and isoform ORF.

---

119  
120  
121  
122 in the RNA library; this observation is consistent with a previous study (Sawyer et al., 2021). Further confounding analysis  
123 of leaderless start codons, which are, by definition, aligned with TSSs, we consistently observed non-random Ribo-seq  
124 signals at TSSs of non-leaderless transcripts (Figure 1 - Figure Supplement 1), albeit to a lesser extent than that observed  
125 for leaderless gene starts.

126  
127 We reasoned that if the putative leaderless isoform and novel ORFs are actively translated, they would exhibit similar  
128 ribosome occupancy profiles to the leaderless annotated ORFs. Indeed, this was the case, with similar relative occupancy  
129 of ribosomes undergoing translation initiation and termination at start/stop codons (Figure 1C-D; we did not analyze isoform  
130 ORF stop codons because they are shared with those of annotated ORFs). Thus, our data are consistent with active  
131 translation of the majority of the 370 putative novel ORFs as leaderless mRNAs. Strikingly, 268 of the leaderless novel  
132 ORFs are sORFs. We conclude that *Mtb* encodes hundreds of actively translated sORFs on leaderless mRNAs.

### 133 134 **Ribo-RET identifies sites of translation initiation in *Mtb***

135 While there are large numbers of leaderless mRNAs in *Mtb*, most mRNAs are leadered (Cortes et al., 2013; Sawyer et al.,  
136 2021; Shell et al., 2015). Given that our data support the existence of >300 novel ORFs translated from the 5' ends of  
137 leaderless mRNAs, we speculated that there are many more unannotated ORFs translated from leadered initiation codons.  
138 While sites of leaderless translation initiation can be readily identified from TSS maps, identification of novel leadered  
139 ORFs is more challenging. Translated leadered ORFs generate signal in Ribo-seq datasets, but identification of novel ORFs  
140 from Ribo-seq data is confounded by (i) the potential for artifactual signal in 5' UTRs due to the binding of RNA-binding



# Figure 2

## A

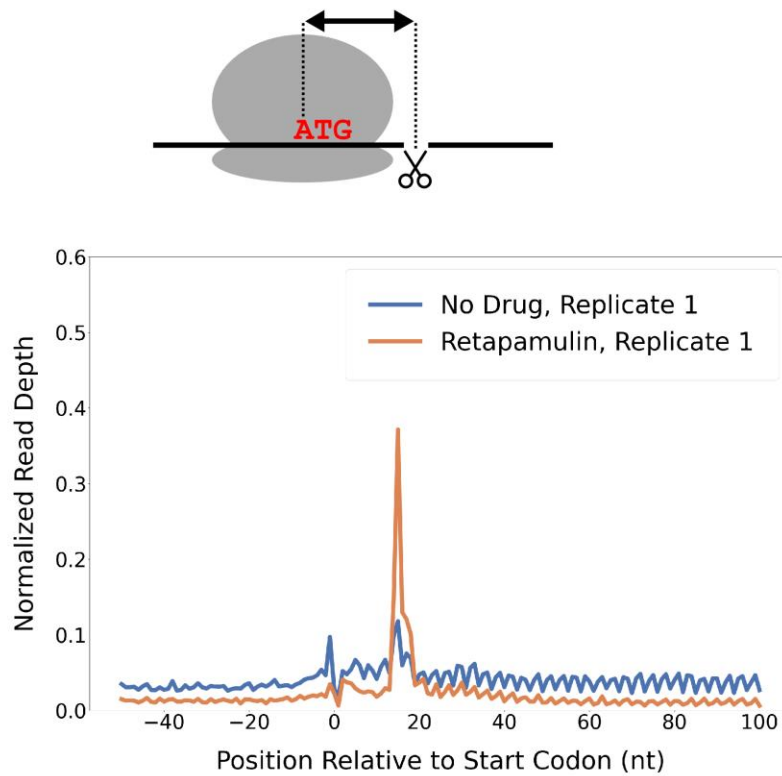

## B

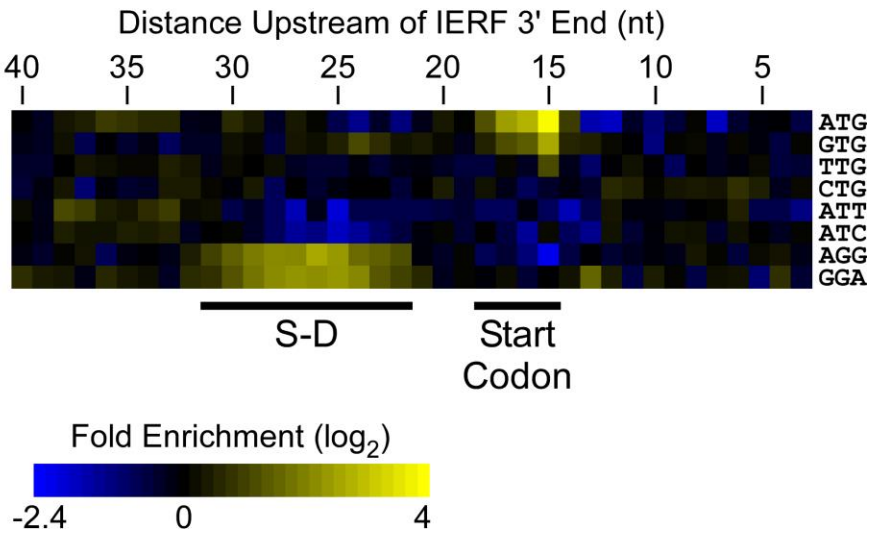



142 **Figure 2. Ribo-RET of *M. tuberculosis* identifies sites of translation initiation.** (A) Metagene plot showing normalized Ribo-seq and Ribo-RET  
143 sequence read coverage (single replicate for each; data indicate the position of ribosome footprint 3' ends) in the region from -50 to +100 nt relative to  
144 the start codons of annotated, leadered ORFs. (B) Heatmap showing the enrichment of eight selected trinucleotide sequences relative to control  
145 sequences, for regions upstream of IERFs. Expected positions of start codons and S-D sequences are indicated below the heatmap.

---

146  
147  
148  
149 proteins (Ji et al., 2016), and (ii) masking of signal by overlapping ORFs on the same strand. To circumvent these problems,  
150 we performed Ribo-RET with *Mtb* to specifically map sites of translation initiation. We aligned the ribosome-protected  
151 RNA fragment sequences to the *Mtb* genome to identify “Initiation-Enriched Ribosome Footprints” (IERFs), sites of  
152 ribosome occupancy that exceed the local background (Table S2). We hypothesized that IERFs correspond to sites of  
153 translation initiation. In support of this idea, there is a strong enrichment of IERF 3' ends 15 nt downstream of the start  
154 codons of annotated, leadered genes; this enrichment is substantially greater than that observed for Ribo-seq data from cells  
155 grown without retapamulin treatment (Figure 2A; Figure 2 - Figure Supplement 1).

156  
157  
158 We determined the abundance of all trinucleotide sequences in the 40 nt regions upstream of IERF 3' ends; there is a >2-  
159 fold enrichment of ATG, GTG and TTG (likely start codons), but not CTG, ATT or ATC, 15 nt upstream of IERF 3' ends,  
160 and an enrichment of AGG and GGA (components of a consensus AGGAGGU Shine-Dalgarno sequence) 22-31 nt  
161 upstream of IERF 3' ends (Figure 2B). We also observed >1.5-fold enrichment of ATG and GTG 14, 16, 17 and 18 nt  
162 upstream of IERF 3' ends. The enrichment and position of start codon and Shine-Dalgarno-like sequence features upstream  
163 of IERFs are consistent with IERFs marking sites of translation initiation. We observed a strong enrichment of A/T  
164 immediately 3' of the IERFs, i.e. on the other side of the site cleaved by micrococcal nuclease (MNase) during the Ribo-  
165 RET procedure; ‘A’ was found most frequently (53% of IERFs), and ‘G’ found the least frequently (2% of IERFs; Figure  
166 2 - Figure Supplement 2). This sequence bias is likely not due to a biological phenomenon, but rather to the sequence  
167 preference of MNase, which is known to display sequence bias when cutting DNA (Dingwall et al., 1981) and RNA  
168 (Woolstenhulme et al., 2015). The sequence bias is apparent in the complete Ribo-RET libraries, with 74% of sequenced  
169 ribosome-protected fragments having an “A” or “U” 3' of the upstream MNase site. Given that the genomic A/T content in  
170 *Mtb* is only 34%, it is likely that inefficient RNA processing by MNase led to an underrepresentation of some G/C-rich

# Figure 3

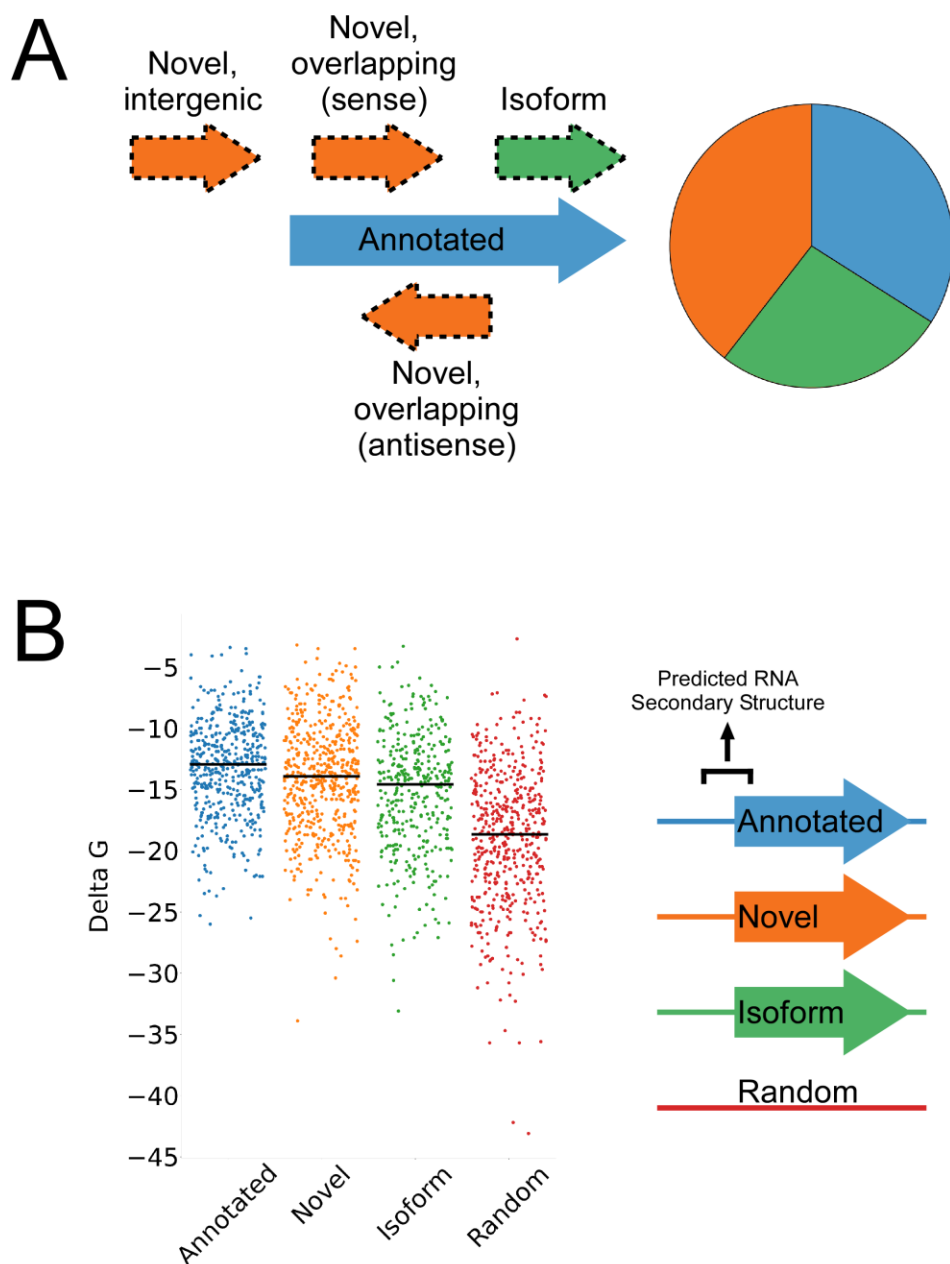

**Figure 3. Features of higher-confidence ORFs identified by Ribo-RET.** (A) Distribution of different classes of ORFs identified by Ribo-RET. The pie-chart shows the proportion of identified ORFs in each class. (B) Strip plot showing the  $\Delta G$  for the predicted minimum free energy structures for the regions from -40 to +20 nt relative to putative start codons for the different classes of ORF, and for a set of 500 random sequences. Median values are indicated by horizontal lines.

177 translation initiation sites in the Ribo-RET data, and may explain the extended footprints (> 15 nt) in G/C rich contexts (see  
178 Discussion). This sequence bias also likely favors cleavage precisely at exposed start codons, which are strongly enriched  
179 for A/T bases, creating more RNA library fragments that end in these sequences (e.g. enriched Ribo-seq signal precisely at  
180 start codons in Figure 2A).

## 182 **Identification of putative ORFs from Ribo-RET data**

183 1,994 IERFs were found in both of two replicate experiments (Table S2). 71% (1,406) of these IERFs were associated with  
184 a potential ATG or GTG start codon 14-18 nt upstream of their 3' ends, or a potential TTG start codon 15 nt upstream of  
185 their 3' ends (Table S3), a far higher proportion than that expected by chance (17%). Thus, these 1,406 IERFs correspond  
186 to the start codons of putative ORFs, with an overall estimated false discovery rate (FDR) of 9% (see Methods for details).  
187 34% (478; FDR of 0.3%) of the putative ORFs precisely match previously annotated ORFs; 27% (373; FDR of 9%) are  
188 located within previously annotated ORFs, in-frame relative to the overlapping gene (i.e. isoform ORFs); 39% (555; FDR  
189 of 15%) are novel ORFs, with no match to a previously annotated stop codon. 359 novel ORFs were found entirely in  
190 regions presently designated as intergenic; the remaining novel ORFs overlap partly or completely with annotated genes in  
191 sense and/or antisense orientations (Figure 3A). Strikingly, 77% (430) of the novel ORFs we identified are sORFs, with 48  
192 novel ORFs consisting of only a start and stop codon (Table S3), an architecture recently described in *E. coli* (Meydan et  
193 al., 2019).

194  
195 We reasoned that if the isoform ORFs and novel ORFs are genuine, they should have S-D sequences upstream, and their  
196 start codons should each be associated with a region of reduced RNA secondary structure, as has been described for ORFs  
197 in other bacterial species (Baez et al., 2019; Del Campo et al., 2015). As we had observed for the set of all IERFs, regions  
198 upstream of isoform ORFs and novel ORFs are associated with an enrichment of AGG and GGA sequences in the expected  
199 location of a S-D sequence (Figure 3 - Figure Supplement 1). This enrichment is lower than for annotated genes, but it is  
200 important to note that a S-D sequence was likely a contributing criterion in computationally predicting the initiation codons  
201 of annotated genes. We also assessed the level of RNA secondary structure upstream of all the putative ORFs identified by  
202 Ribo-RET. The predicted secondary structure for a set of random genomic sequences was significantly higher than the  
203 predicted secondary structure around the start of the identified annotated, novel, and isoform ORFs (Mann-Whitney U Test  
204  $p < 2.2e^{-16}$  in all cases; Figure 3B). Moreover, the predicted secondary structure around the start of the annotated ORFs was

# Figure 4

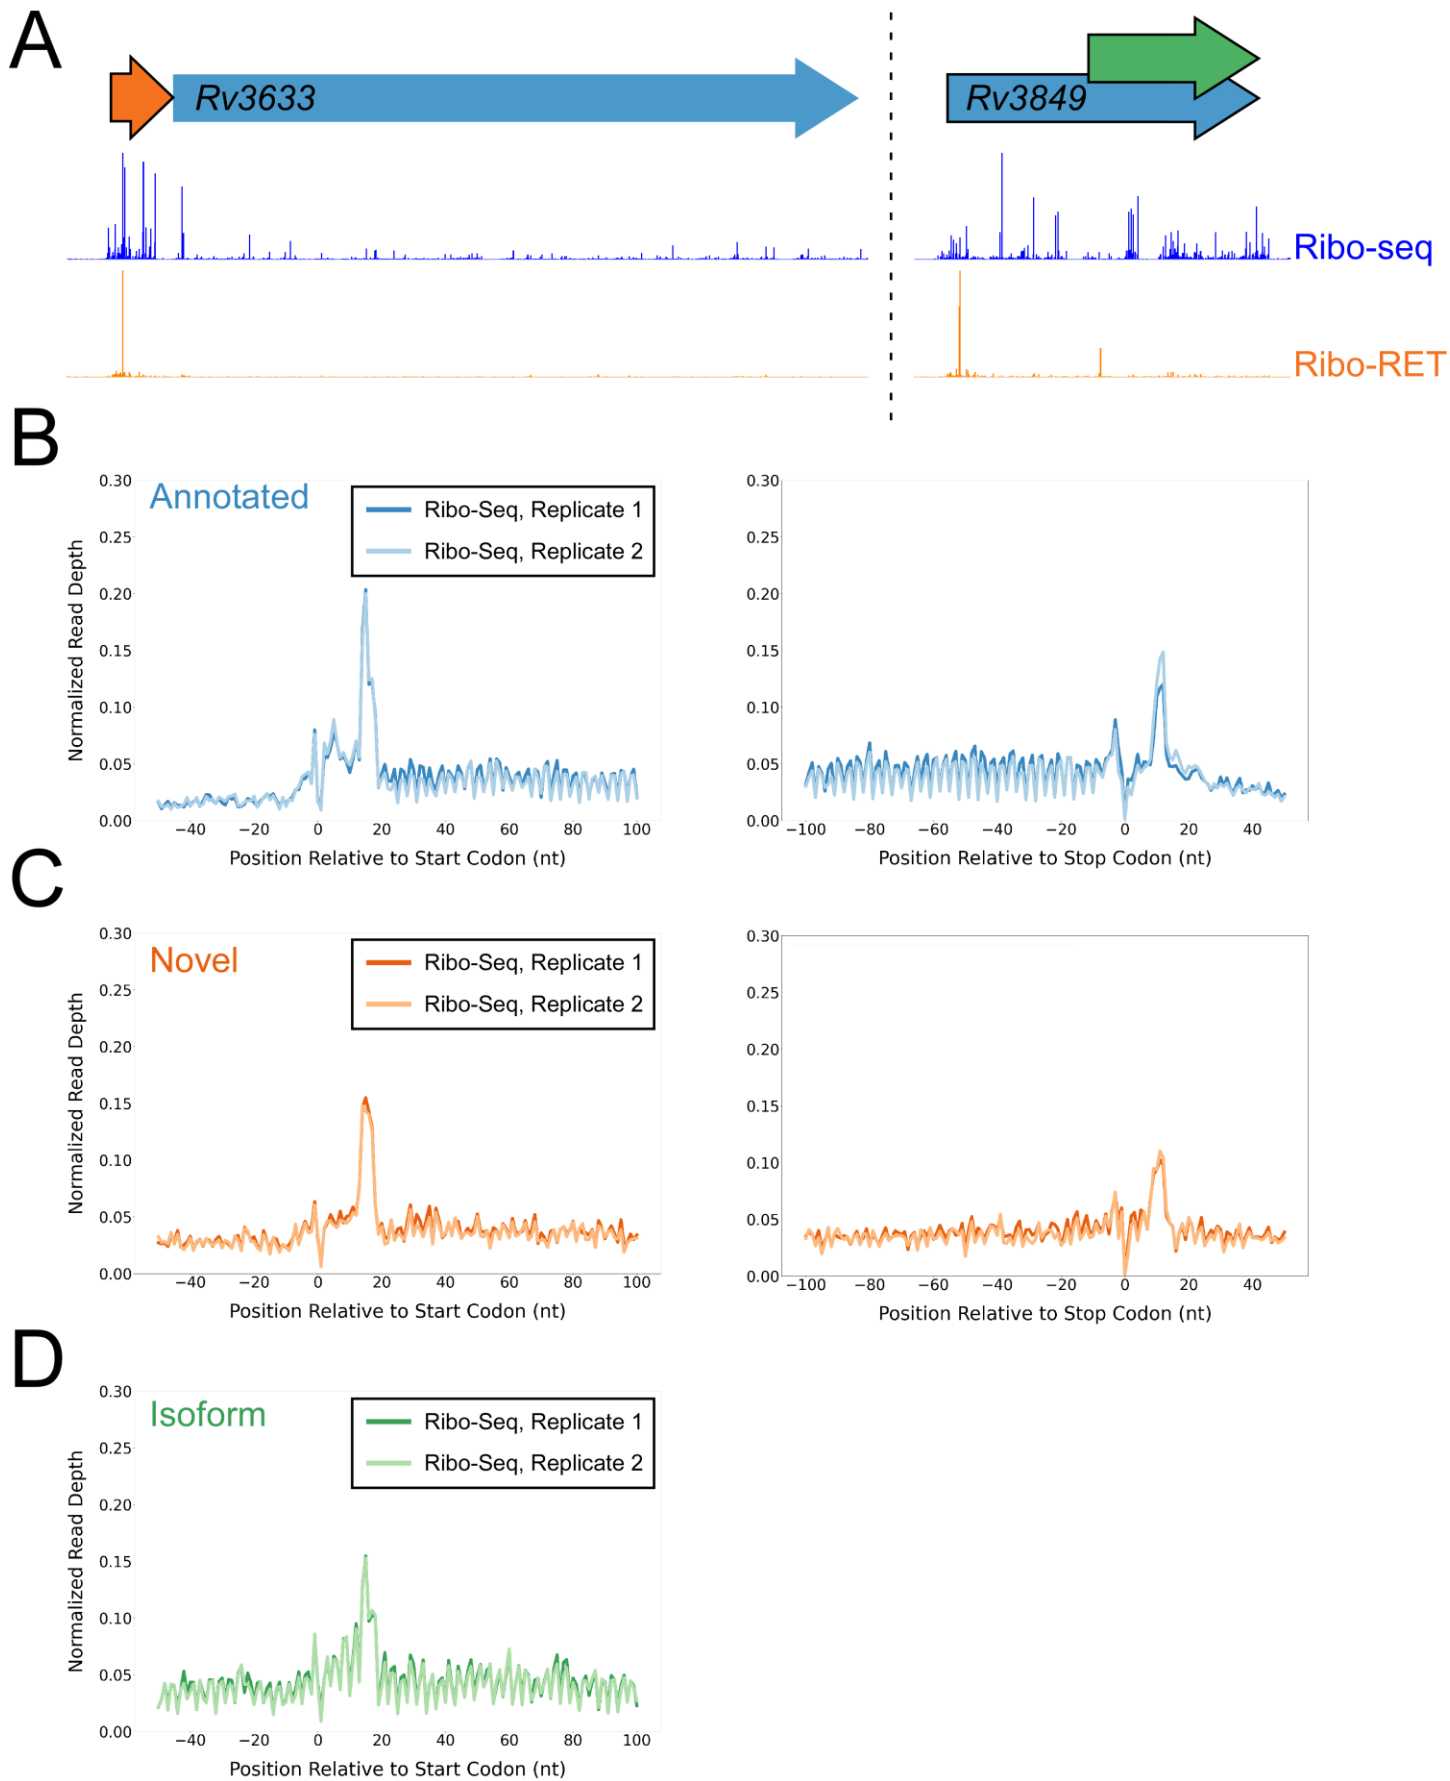

206 **Figure 4. Ribo-seq data support the translation of hundreds of isoform and novel ORFs identified by Ribo-RET.** (A) Ribo-seq and Ribo-RET  
207 sequence read coverage (read 3' ends) across two genomic regions, showing examples of putative ORFs in the annotated (blue arrow), novel (orange  
208 arrow), and isoform (green arrow) categories. ORFs are represented as arrows, with ORFs identified by Ribo-RET shown with a black outline. (B)  
209 Metagene plot showing normalized Ribo-seq sequence read coverage (data indicate the position of ribosome footprint 3' ends) for untreated cells in  
210 the regions around start (left graph) and stop codons (right graph) of ORFs predicted from Ribo-RET profiles that correspond to previously annotated  
211 genes. The schematics show the position of initiating/terminating ribosomes, highlighting the expected site of ribosome occupancy enrichment at the  
212 downstream edge of the ribosome. (C) Equivalent data to (B) but for putative novel ORFs identified from Ribo-RET data. (D) Equivalent data to (B)  
213 but for putative isoform ORFs identified from Ribo-RET data. Only data for start codons are shown because the same stop codon is used by both an  
214 annotated and isoform ORF.

---

216  
217  
218 only modestly, albeit significantly, higher than that of novel ORFs (Mann-Whitney U Test  $p = 1e^{-3}$ ). Collectively, the ORFs  
219 identified from Ribo-RET data exhibit the expected features of genuine translation initiation sites.

### 221 **ORFs identified by Ribo-RET are actively translated in untreated cells**

222 To determine if isoform ORFs and novel ORFs are actively and fully translated in cells not treated with retapamulin, we  
223 analyzed Ribo-seq data generated from cells grown without drug treatment. We assessed ribosome occupancy for annotated,  
224 novel, and isoform ORFs identified by Ribo-RET. As for the predicted leaderless ORFs, we reasoned that expressed  
225 leadered ORFs would be associated with increased ribosome occupancy at start and stop codons, as exemplified by  
226 previously annotated, leadered ORFs (Figure 1A) (Oh et al., 2011; Woolstenhulme et al., 2015). Accordingly, annotated  
227 ORFs identified by Ribo-RET were strongly enriched for Ribo-seq signal 15 nt downstream of their start codons and 12 nt  
228 downstream of their stop codons (Figure 4A-B). We observed similar Ribo-seq enrichment profiles at the start and stop  
229 codons of novel ORFs, and downstream of the start codons of isoform ORFs (Figure 4A, C-D), but we did not observe these  
230 enrichment profiles for a set of mock ORFs (Figure 4 - Figure Supplement 1A). Moreover, we did not observe enrichment  
231 of RNA-seq signal at start/stop codons, ruling out biases associated with library construction (Figure 4 - Figure Supplement  
232 1B-D). Overall, our data are consistent with most Ribo-RET-predicted isoform and novel ORFs being actively translated  
233 from start to stop codon, independent of retapamulin treatment.

### 234 **Identification of lower-confidence ORFs from Ribo-RET data**

236 In addition to the 1,994 IERFs present in both replicates of Ribo-RET data, 4,216 IERFs were found in only the first replicate  
237 dataset, which was associated with a stronger enrichment of ribosome occupancy at start codons (compare Figure 2A and  
238 Figure 2 - Figure Supplement 1). Strikingly, 2,791 (66%) of IERFs found in only the first Ribo-RET dataset were associated  
239 with a potential start codon 14-18 nt upstream of their 3' ends (Table S3; see Methods for details), a far higher proportion  
240 than that expected by chance (17%), and a similar proportion to that observed for IERFs found in both replicate Ribo-RET  
241 datasets (70%). We refer to ORFs identified from only the first Ribo-RET dataset as “lower-confidence” ORFs, reflecting  
242 the marginally higher FDRs; we refer to ORFs identified from both Ribo-RET datasets as “higher-confidence” ORFs. 22%  
243 (614; FDR of 0.6%) of the lower-confidence ORFs are annotated, 29% (801; FDR of 10%) are isoform, and 49% (1,372;  
244 FDR of 16%) are novel. 77% (1,061) of the novel lower-confidence ORFs are sORFs, with 120 consisting of only a start  
245 and stop codon (Figure 4 - Figure Supplement 2A), mirroring the proportions observed in the higher-confidence dataset.

246  
247 Regions upstream of lower-confidence annotated, novel, and isoform ORFs are associated with an enrichment of AGG and  
248 GGA sequences in the expected location of a Shine-Dalgarno sequence (Figure 4 - Figure Supplement 2B). The predicted  
249 secondary structure for a set of random genomic sequences was significantly higher than the predicted secondary structure  
250 around the start of the lower-confidence annotated ORFs, novel ORFs, and isoform ORFs (Mann-Whitney U Test  $p < 2.2e^{-16}$   
251 in all cases; Figure 4 - Figure Supplement 2C). Moreover, the predicted secondary structure around the start of the lower-  
252 confidence annotated ORFs was not significantly higher than that of the lower-confidence novel ORFs (Mann-Whitney U  
253 Test  $p = 0.22$ ). Lastly, we examined ribosome occupancy at the start and stop codons of the lower-confidence ORFs from  
254 our Ribo-seq data generated from cells grown without drug treatment. Lower-confidence annotated, novel, and isoform  
255 ORFs were strongly enriched for Ribo-seq signal 15 nt downstream of their start codons and 12 nt downstream of their stop  
256 codons (Figure 4 - Figure Supplement 2D-F). Collectively, the lower-confidence ORFs exhibit the characteristics of actively  
257 translated regions.

### 258 259 **Novel ORFs tend to be weakly expressed but efficiently translated**

260 To investigate how efficiently novel ORFs are expressed, we determined RNA levels from RNA-seq data, and ribosome  
261 occupancy levels from Ribo-seq data, for all annotated and novel ORFs detected in this study. We also determined RNA  
262 and ribosome occupancy levels for putatively untranslated regions of 1,854 control transcripts (see Methods for details).  
263 For novel ORFs, we analyzed only the 871 ORFs for which  $\geq 50$  nt of the ORF is  $\geq 30$  nt from an annotated gene on the same

# Figure 5

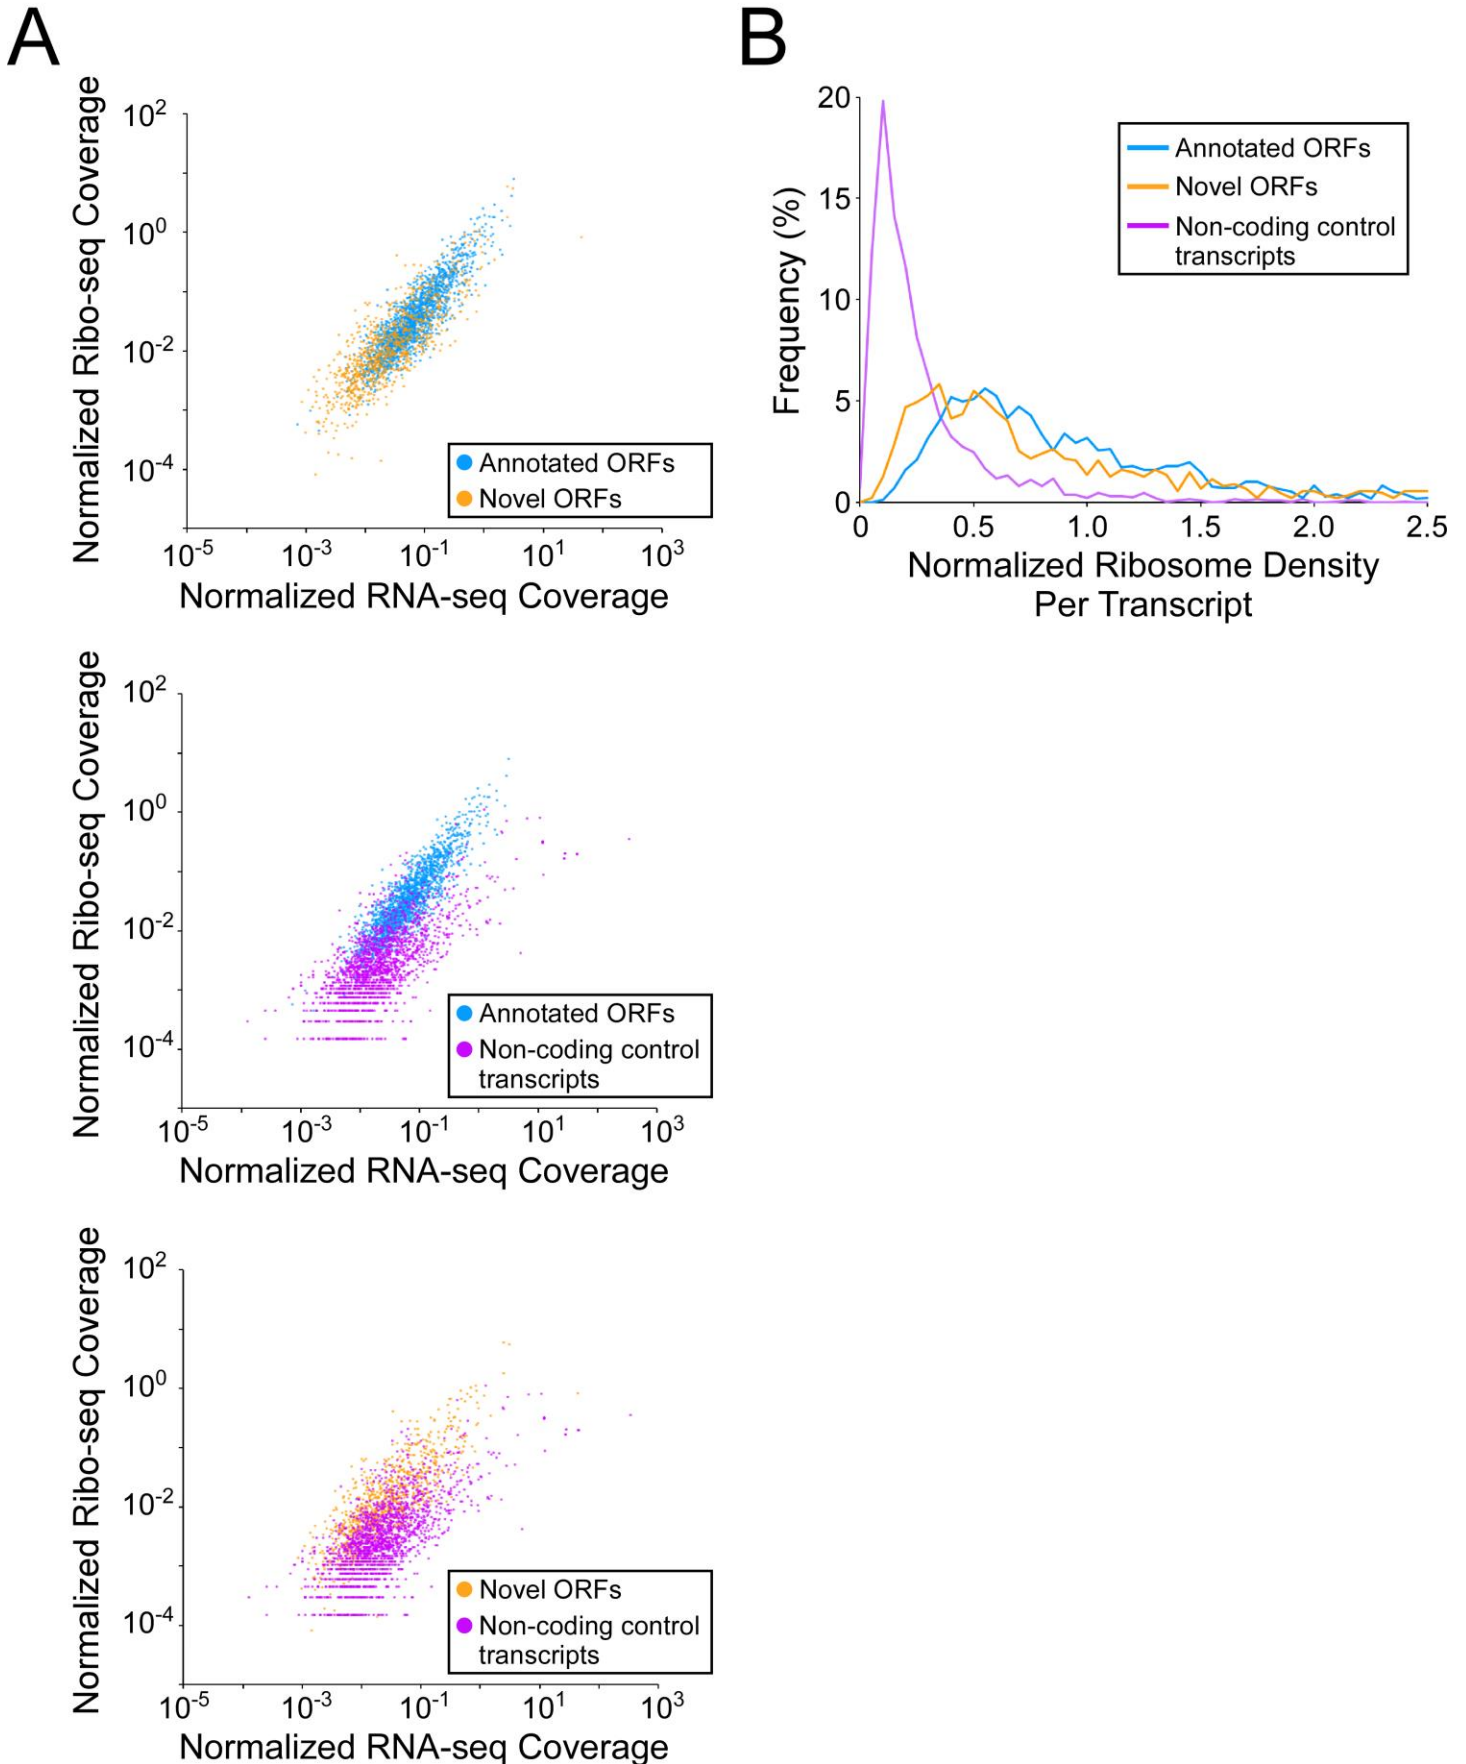



265 **Figure 5. Novel ORFs are efficiently translated.** (A) Pairwise comparison of normalized RNA-seq and Ribo-seq coverage for annotated, novel and  
266 non-coding control transcripts. Reads are plotted as RPM per nucleotide using a single replicate of each dataset for reads aligned to the reference  
267 genome at their 3' ends. The categories compared are: (i) annotated ORFs (higher-confidence and lower-confidence ORFs detected by Ribo-RET, and  
268 leaderless ORFs; blue datapoints), (ii) novel ORFs (higher-confidence and lower-confidence ORFs detected by Ribo-RET and leaderless ORFs, for  
269 regions at least 30 nt from an annotated gene; orange datapoints), and (iii) a set of 1,854 control transcript regions that are expected to be non-coding  
270 (see Methods; purple datapoints). ORF/transcript sets are plotted in pairs to aid visualization. (B) Normalized ribosome density per transcript (ratio of  
271 Ribo-seq coverage to RNA-seq coverage) for the same sets of ORFs/transcripts. The graph shows the frequency (%) of ORFs/transcripts within each  
272 group for bins of 0.05 density units.

---

273  
274  
275  
276 strand, to avoid overlapping RNA-seq and Ribo-seq signals. As a group, novel ORFs have lower RNA levels and lower  
277 ribosome occupancy levels than the 1,670 annotated ORFs (Figure 5A top panel; Figure 5 - Figure Supplement 1A top  
278 panel). By contrast, the non-coding control transcripts as a group have similar RNA levels to novel ORFs, but lower  
279 ribosome occupancy levels (Figure 5A, lower panels; Figure 5 - Figure Supplement 1A lower panels). To estimate the  
280 ribosome occupancy per transcript, we determined the ratio of Ribo-seq reads to RNA-seq reads for each region analyzed  
281 (Figure 5B; Table S1 + S3). As a group, novel ORFs have only slightly lower ribosome occupancy per transcript than  
282 annotated ORFs, while both novel and annotated ORFs have markedly higher ribosome occupancy per transcript than the  
283 control non-coding transcripts. We conclude that the RNA level for novel ORFs tends to be lower than that for annotated  
284 ORFs, but novel ORFs are translated with similar efficiency to annotated ORFs, and are thus clearly distinct from non-  
285 coding transcripts. The overall lower expression of novel ORFs relative to annotated ORFs is also reflected by lower Ribo-  
286 RET occupancy at their start codons (Figure 5 - Figure Supplement 1B-C).

### 288 **Validation of novel ORFs using Mass Spectrometry**

289 Mass spectrometry (MS) provides a rigorous methodology to define the *Mtb* proteome. However, we predict that many of  
290 the small proteins we describe here are likely to be missed by MS because (i) there are biases against retaining small proteins  
291 in standard sample preparation methods and, (ii) small proteins generate few peptides. We hypothesized that we could enrich  
292 for small proteins by processing the normally discarded fractions from each of two standard preparations (Wiśniewski et  
293 al., 2009). In total, we analyzed five samples prepared in different ways designed to enrich for small proteins (see Methods).  
294 We also analyzed a sample made by in-solution digestion, which does not discard small proteins during final preparative

# Figure 6

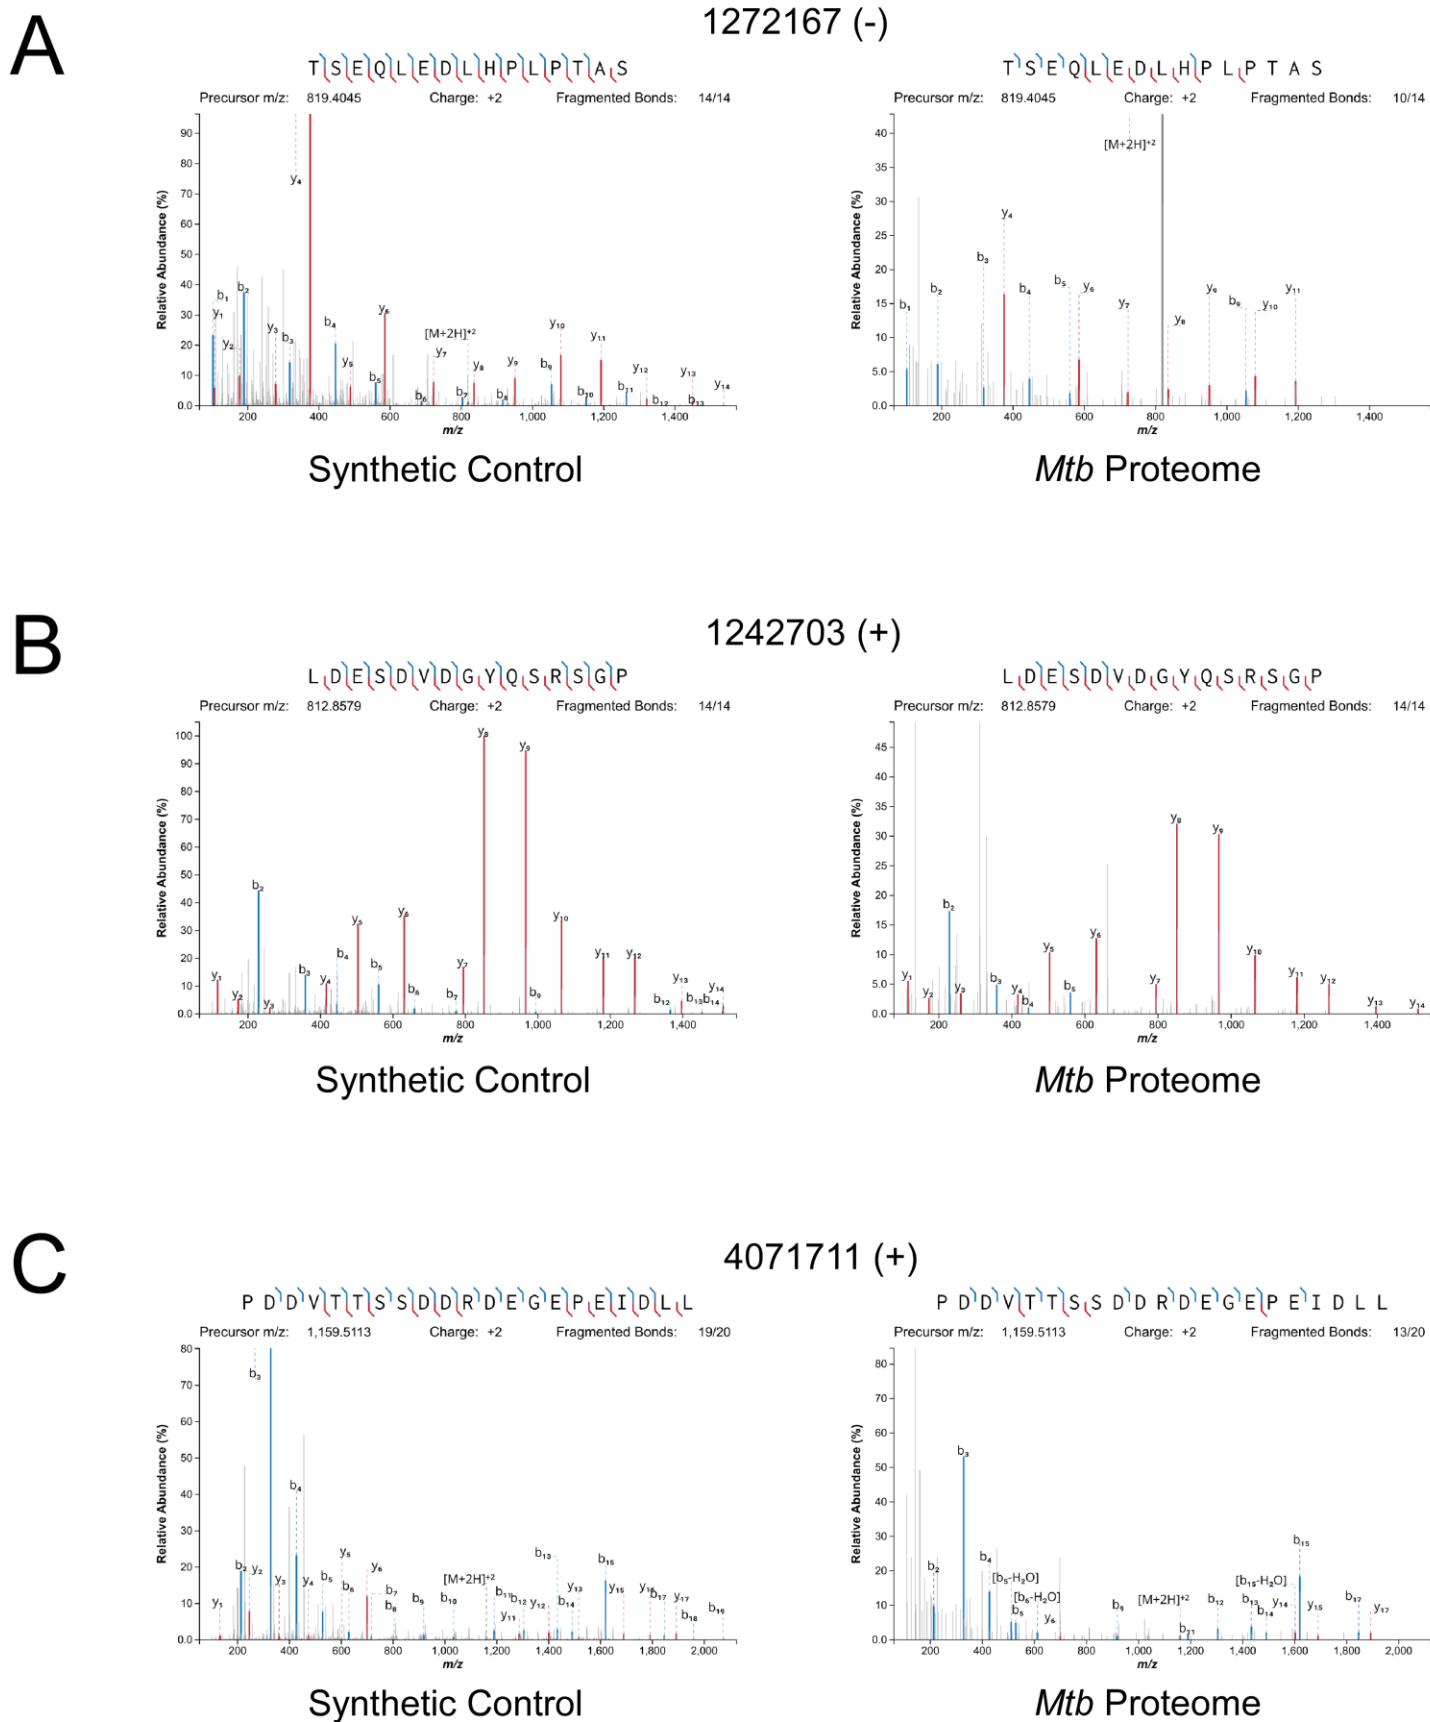

296 **Figure 6. Mass spectrometry validation of selected ORFs.** MS/MS spectra from novel ORFs measured with a synthetic peptide compared to spectra  
297 measured from the *Mtb* proteome. The genome coordinate and strand of each selected novel ORF start codon is indicated. **(A)** Leaderless ORF 1272167  
298 (-) was identified from amino-acids 2-24. The  $y_4$  and parent  $m/z$  ions are off-scale. **(B)** Leaderless ORF 1242703 (+) was observed from amino acids  
299 46-61. **(C)** Leadered ORF 4071711 (+) was detected as from amino acids 4-26. The  $b_3$  ion is off-scale. Measured b-ions are in blue, and y-ions are in  
300 red. The nearly complete spectrum obtained for each peptide and the fragment-mass balance clearly indicate that these sORFs are identical to their  
301 synthetic cognates.

---

302  
303  
304  
305 stages (see Methods). Nano-UHPLC-MS/MS on these samples identified proteins encoded by 44 of the putative leaderless  
306 and leadered novel ORFs identified in this study, at an estimated overall FDR of 1% (Tang et al., 2008). Novel proteins  
307 detected by MS are indicated in Tables S1 and S3. Eight proteins were detected in more than one preparation, or with  
308 independent peptide matches. Direct analysis from the mixed-organic extraction (with and without demethylation), and  
309 analysis of a minimally treated in-solution digestion, yielded the majority of the protein identifications. Ten of the proteins  
310 we detected are <50 amino acids in length, with the shortest being 23 amino acids long. The methods aimed at enriching for  
311 small proteins detected proteins of a smaller average size: the mean predicted length of novel proteins identified with small  
312 protein enrichment strategies was 60 amino acids, versus 86 amino acids for proteins identified from in-solution digestion.  
313 We anticipate that additional modifications in the enrichment protocols for small proteins will further improve the sensitivity  
314 of detection of small proteins.

315  
316 Since many small proteins were only identified as single peptides by MS, we sought a direct approach to validate their  
317 detection. Three MS-detected novel small proteins were commercially synthesized, and their MS/MS spectra determined  
318 for empirical comparison to the native small protein. The three proteins were selected from high- (local FDR < 1%), and  
319 medium- (local FDR < 5%) search scores. Two of these proteins are translated from leaderless ORFs and one from a leadered  
320 ORF. For all three proteins, the numerical ions from the synthetic peptide matched those from the proteomic datasets, with  
321 conservation of the mass intensity (Figure 6). We conclude that all three proteins are translated as stable products that match  
322 the sequence expected based on Ribo-RET data.

# Figure 7

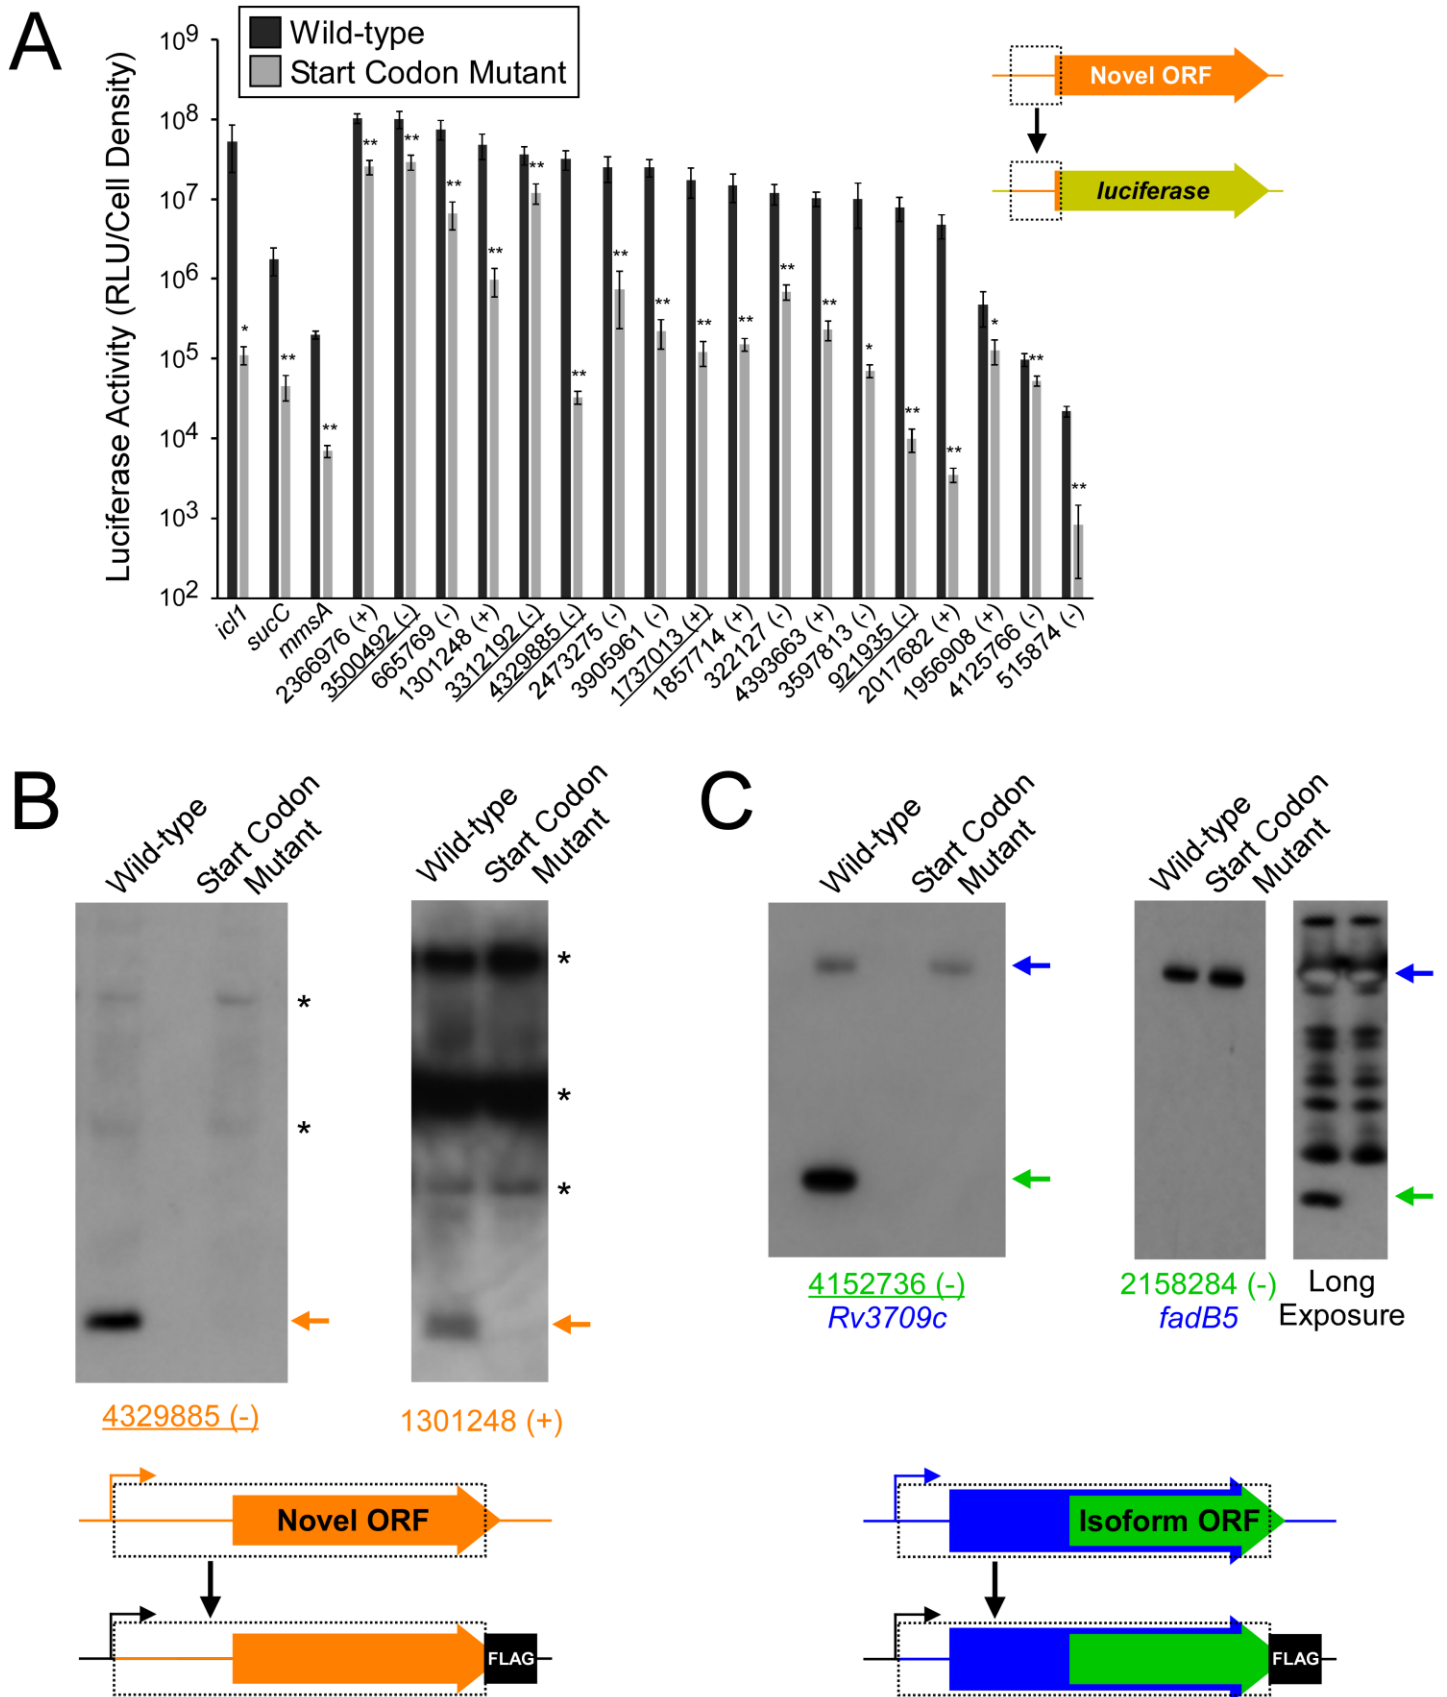

327 **Figure 7. Validation of selected novel and isoform ORFs.** (A) Luciferase reporter assays for constructs consisting of the region from position -25 up  
328 to the Ribo-RET-predicted start codon fused translationally to a luciferase reporter gene, as illustrated in the schematic. Fusions were tested for 18  
329 putative novel ORFs identified from Ribo-RET data, and three previously annotated ORFs that serve as positive controls. Wild-type and mutant start  
330 codon reporter construct pairs were separately integrated into the *M. smegmatis* chromosome to quantify the net contribution of translation from the  
331 predicted start codon. The genome coordinate and strand of each selected novel ORF start codon is indicated. Underlined coordinates indicate novel  
332 ORFs identified from a single Ribo-RET replicate dataset. (B) Western blot with anti-FLAG antibody to detect FLAG-tagged novel ORFs integrated  
333 into the *M. smegmatis* chromosome with either an intact (wild-type) or mutated start codon. The integrated constructs included the entire 5' UTR and  
334 open-reading frame (indicated by a dashed box), but not the native promoter. Bands corresponding to the tagged novel ORF are indicated with an  
335 orange arrow. Asterisks indicate the positions of common cross-reacting proteins. Novel ORF 4329885 (-) was identified from a single Ribo-RET  
336 replicate dataset. (C) Western blots with anti-FLAG antibody to detect FLAG-tagged isoform ORFs integrated into the *M. smegmatis* genome with  
337 either an intact (wild-type) or mutated start codon. The integrated constructs included the overlapping full-length, annotated ORF and its entire 5' UTR.  
338 Bands corresponding to the tagged full-length and isoform ORFs are indicated with blue and green arrows, respectively. The western blot for the  
339 isoform ORF overlapping *fadB5* was developed with a short (left panel) and a long (right panel) exposure due to the large difference in steady-state  
340 levels of the full-length and isoform proteins. Isoform ORF 4152736 (-) was identified from a single Ribo-RET replicate dataset.

---

### 344 **Validation of novel and isoform start codons using reporter gene fusions**

345 We sought to validate selected novel and isoform ORFs. We hypothesized that the start codons identified by Ribo-RET  
346 would direct translation initiation in a reporter system that controls for extraneous contextual variables. We initially tested  
347 18 novel predicted start codons by fusing them to a luciferase reporter, including 25 bp of upstream sequence for each ORF  
348 tested. We constructed equivalent reporter fusions with a single base substitution in the predicted start codon (RTG to RCG).  
349 For comparison, we included wild-type and start codon mutant luciferase reporter fusions for three annotated ORFs (*icl1*,  
350 *sucC*, and *mmsA*). The reporter plasmids were integrated into the chromosome of *M. smegmatis*. Luciferase expression from  
351 each of the 20 luciferase fusions, including those for five novel ORFs from our lower-confidence list, was significantly  
352 reduced by mutation of the start codon (Figure 7A;  $p < 0.05$  or  $0.01$ , as indicated, one-way Student's T-test). Mutation of  
353 the start codons reduced, but did not abolish, luciferase expression; this was true even for the three annotated ORFs. We  
354 speculate that translation can initiate at low levels from non-canonical start codons, as has been described for *E. coli* (Hecht  
355 et al., 2017). We note that our plasmid reporter system was designed to minimize extraneous variables between constructs  
356 that could confound initiation codon evaluation, which necessarily removed the candidate start codons from their larger

357 native context. Overall, the luciferase reporter fusion data are consistent with active translation from the start codons  
358 identified by Ribo-RET.

### 360 **Validation of novel and isoform ORFs using western blotting**

361 To directly assess translation of selected putative ORFs, we generated constructs for two complete novel ORFs with 3 x  
362 FLAG tags fused at the encoded C-terminus. We generated equivalent constructs with a single base substitution in the  
363 putative start codon. The tagged constructs were integrated into the chromosome of *M. smegmatis*. The two proteins were  
364 detected by western blot, and they were not detected from cells with mutant start codons (Figure 7B). We generated  
365 equivalent 3 x FLAG-tagged strains for two isoform ORFs. We detected the overlapping, full-length protein by western  
366 blot, and expression of these full-length proteins was unaffected by mutation of the isoform ORF start codon (Figure 7C).  
367 We also detected a protein of smaller size, corresponding to the expected size of the isoform protein; expression of these  
368 small isoform proteins was not detected in the start codon mutant constructs (Figure 7C). Notably, for the pairs of novel and  
369 isoform proteins we detected by western blot, the two more highly expressed proteins were from the lower-confidence set  
370 of ORFs. Overall, these data support the ORF predictions from the Ribo-RET data, and the existence of novel and isoform  
371 ORFs identified from only a single replicate of Ribo-RET data.

### 373 **Limited G/C-skew in the codons of non-overlapping novel ORFs**

374 The *Mtb* genome has a high G/C content (65.6%). There is a G/C bias within codons of annotated genes: the second position  
375 of codons is particularly constrained to encode specific amino acids, which supersedes the G/C bias of the genome, whereas  
376 the third (wobble) position has few such constraints. Hence, functional ORFs under purifying selection exhibit G/C content  
377 below the genome average at the second codon position and above the genome average at the third codon position (Bibb et  
378 al., 1984). We refer to the difference in G/C content at third positions and second positions of codons as “G/C-skew”, with  
379 positive G/C-skew expected for ORFs subject to purifying selection. We reasoned that we could exploit G/C-skew to assess  
380 the likelihood that novel ORFs identified by Ribo-RET have experienced purifying selection at the codon level. We assessed  
381 G/C skew for all 2,299 novel ORFs identified in this study (leadered and leaderless). We limited the analysis to regions that  
382 do not overlap previously annotated genes, since G/C-skew could be impacted by selective pressure on an overlapping gene;  
383 62% of ORFs were discarded because they completely overlap an annotated gene, and 17% of ORFs had some portion  
384 excluded. The set of all tested novel ORFs has modest, but significant, positive G/C-skew (Fisher’s exact test  $p < 2.2e^{-16}$ ;

## Figure 8

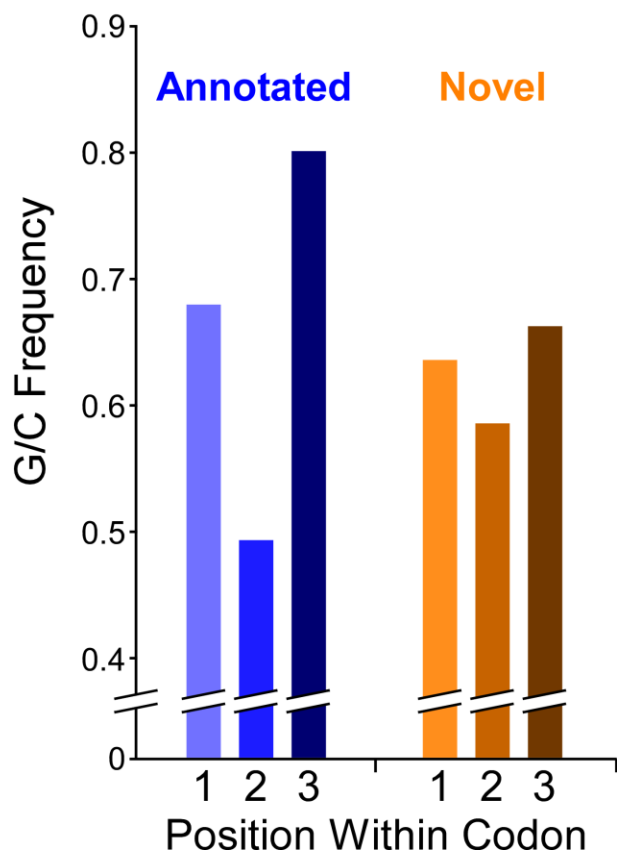

385

386

387

388

389

390

391

392

393

394

395

396

397

398

399

**Figure 8. G/C skew within codons of novel and annotated ORFs.** Histogram showing the frequency of G/C nucleotides at each of the three codon positions for annotated ORFs or novel ORFs identified from Ribo-RET data. Note that only regions of novel ORFs that do not overlap a previously annotated ORF were analyzed.

n = 19,750 codons; Figure 8; Tables S1 and S3), consistent with a subset of codons in this class having been under purifying selection. However, the degree of positive G/C-skew for the novel ORFs is much smaller than that for the annotated ORFs we identified in our datasets (Figure 8), suggesting that the proportion of novel ORFs experiencing purifying selection, and/or the intensity of that selection, is much lower than that for the annotated ORF group. To identify specific novel ORFs that have likely experienced purifying selection of their codons, and hence are likely to contribute to cell fitness, we determined G/C-skew for the non-overlapping regions of each novel ORF individually. We then ranked the ORFs by the significance of their G/C-skew (Fisher's exact test; see Methods for details). Of the 103 ORFs with the most significant



400 G/C-skew, there is a strong enrichment for positive G/C-skew: 90 of the ORFs have positive G/C skew and 13 have negative  
401 G/C skew. This suggests that ~80 of the 90 ORFs with positive G/C skew have been subject to purifying selection on their  
402 codons. It is important to note that the size of the ORF is a major consideration when determining the significance of G/C-  
403 skew; the small size of novel ORFs therefore limits this analysis. Moreover, the G/C-skew analysis provides no information  
404 on regions of novel ORFs that overlap annotated genes. Hence, the number of novel ORFs that we predict to be functional  
405 based on their G/C-skew is almost certainly a substantial underestimate. Nonetheless, the overall G/C-skew of novel ORFs  
406 relative to that of annotated ORFs provides strong evidence that the majority of novel ORFs are not functional.

## DISCUSSION

### Ribo-RET identifies thousands of isoform and novel ORFs

Using Ribo-RET, we have identified thousands of actively translated novel and isoform ORFs with high confidence. This conclusion is strongly supported by the clear association of initiating and terminating ribosomes with the start and stop codons, respectively, in untreated cells. We note that the enrichment of terminating ribosomes at the stop codons of novel ORFs in Ribo-seq data (i.e. no retapamulin treatment) is independent of the enrichment of initiating ribosomes at start codons observed in Ribo-RET data. The novel and isoform ORFs identified by Ribo-RET are also supported by validation of selected ORFs using multiple independent genetic and biochemical approaches. Overall, our data reveal a far greater number of ORFs than previously appreciated, with annotated ORFs outnumbered by isoform and novel ORFs. Many genomic regions encode overlapping ORFs on opposite strands or on the same strand in different frames, contrary to the textbook view of genome organization.

There are ~4,000 annotated *Mtb* ORFs, but Ribo-RET under-sampled these, identifying 1,092. Failure to identify more annotated ORFs is likely due to the following biological and technical reasons: (i) Leaderless genes were excluded from the Ribo-RET analysis; (ii) Many ORF start codons are likely to be misannotated, so they would be classified as isoforms. (iii) Many genes are likely to be expressed at levels too low to be detected. In support of this idea, the median Ribo-seq read coverage for leadered, annotated ORFs identified by Ribo-RET was significantly higher than that for equivalent ORFs not identified by Ribo-RET (3.8-fold; Mann-Whitney U test  $p < 2.2e^{-16}$ ). (iv) The A/T sequence preference of MNase (Figure 2 - Figure Supplement 2) likely led to exclusion of some ORFs from the Ribo-RET libraries. In support of this idea, the base at position +17 relative to the start codon (i.e. immediately downstream of the preferred MNase cleavage site) is 1.7-fold more likely to be 'A', and 1.6-fold less likely to be 'G', for annotated ORFs we identified, than for those for we did not. Given the clear underrepresentation of annotated ORFs in our datasets, we conclude that there are many more isoform and novel ORFs to be discovered.

### The abundance of novel start codons likely reflects pervasive translation

Evidence from other bacterial species suggests that the primary determinants of leadered translation initiation in *Mtb* are (i) a suitable start codon, (ii) an upstream sequence that can act as a S-D, and (iii) low local secondary structure around the

435 ribosome-binding site. We detected enrichment of three different start codons in Ribo-RET data (Figure 2B), and S-D  
436 sequences can be located at a range of distances upstream of the start codon (Vellanoweth and Rabinowitz, 1992). Hence,  
437 there is limited sequence specificity associated with translation initiation. Moreover, a recent report showed that in *E. coli*,  
438 an S-D sequence is not an essential requirement for translation initiation (Saito et al., 2020). Leaderless translation initiation  
439 has even fewer sequence requirements; our data suggest that a 5' AUG or GUG is sufficient for robust leaderless translation  
440 (Shell et al., 2015). While AUG and GUG represent only ~3% of all possible trinucleotide sequences, there is likely to be a  
441 strong bias towards 5' AUG or GUG from the process of transcription initiation; the majority of TSSs in *Mtb* are purines,  
442 and the majority of +2 nucleotides are pyrimidines (Cortes et al., 2013; Shell et al., 2015). We propose that many *Mtb*  
443 transcripts are subject to spurious translation either by the leaderless or leadered mechanism, simply because the nominal  
444 sequence requirements for these processes commonly occur by chance. Thus, there is pervasive translation of the *Mtb*  
445 transcriptome, similar to the pervasive translation described in eukaryotes (Ingolia et al., 2014; Ruiz-Orera et al., 2018;  
446 Wacholder et al., 2021). Pervasive translation has been proposed as an explanation for some of the novel ORFs detected in  
447 *E. coli* by Ribo-RET (Meydan et al., 2019). However, only 5% and 21% of all *E. coli* BL21 ORFs inferred from Ribo-RET  
448 data were isoform and novel ORFs, respectively (Meydan et al., 2019), considerably lower proportions than we observed  
449 for *Mtb*. The apparently much greater extent of pervasive translation in *M. tuberculosis* relative to *E. coli* suggests that the  
450 selective pressures on pervasive translation vary across bacterial species, or that the requirements for translation initiation  
451 vary according to genome nucleotide content.

452  
453 The process of pervasive translation is analogous to pervasive transcription, whereby many DNA sequences function as  
454 promoters, often from within genes, to drive transcription of spurious RNAs (Lybecker et al., 2014; Wade and Grainger,  
455 2014). Indeed, there are many intragenic promoters in *Mtb* (Cortes et al., 2013; Shell et al., 2015), providing an additional  
456 source of potential spurious translation. We speculate that like spurious transcripts, which are rapidly degraded by RNases,  
457 the protein products of pervasive translation are rapidly degraded. Since Ribo-seq and Ribo-RET detect translation, not the  
458 protein product, the stability of the encoded proteins would not impact our ability to detect the corresponding ORFs.

459  
460 Pervasive translation, by definition, means that ribosomes will spend some fraction of the time translating spurious ORFs.  
461 Although we detected many more novel ORFs than annotated ORFs, the small average size of novel proteins limits the total  
462 number of codons in all detected novel ORFs to ~20% that of annotated ORFs. Moreover, novel ORFs as a group are

expressed ~3-4-fold lower than annotated ORFs (Figure 5; Figure 5 - Figure Supplement 1). Thus, it is likely that <10% of translation in *Mtb* at any given time is of spurious ORFs, so pervasive translation is unlikely to be overly detrimental to the cell.

### **Proto-genes and the evolution of new functional genes**

Previous studies of eukaryotes indicate the existence of proto-genes, targets of pervasive translation of intergenic sequences or sequences antisense to annotated genes (Ingolia et al., 2014; Ruiz-Orera et al., 2018; Wacholder et al., 2021). Proto-genes have the potential to evolve into functional ORFs that contribute to cell fitness (Blevins et al., 2021; Carvunis et al., 2012; Lu et al., 2017; Ruiz-Orera et al., 2018; Vakirlis et al., 2018, 2020; Van Oss and Carvunis, 2019). There is also evidence that some bacterial protein-coding genes evolved from intergenic sequence (Yomtovian et al., 2010). Our data suggest that *Mtb* has a rich source of proto-genes. Indeed, proportional to genome size, we identified many more novel translated ORFs in *Mtb* than have been experimentally detected in any eukaryotic species. This could reflect differences in the extent of pervasive transcription and translation between bacteria and eukaryotes, or the sensitivity of our approach. As described for proto-genes in yeast, the novel ORFs we identified in *Mtb* tend to be less well expressed, have less adapted codon usage, and are shorter than annotated genes (Blevins et al., 2021; Carvunis et al., 2012). Pervasive translation in *Mtb* likely facilitates the evolution of new gene function in *Mtb*. Since pervasive translation represents a low proportion of all translation, the fitness cost of pervasive translation may be balanced by the benefits of having a large pool of proto-genes.

### **New functional ORFs/proteins in *Mtb***

The question of whether an ORF is functional first requires a definition of function (Keeling et al., 2019). Here, we define function as the ability to improve cell fitness. While functional ORFs need not be under purifying selection, ORFs undergoing purifying selection are presumably functional. One metric of purifying selection available in the G/C-rich genomes of mycobacteria is G/C-skew. Analysis of G/C-skew in the codons of novel ORFs identified 90 ORFs that are likely to be functional (positive G/C,  $p < 0.1$  in Tables S1 and S3). 54 of these 90 novel ORFs are leadered, and the Ribo-RET signal associated with these 54 ORFs was significantly higher than that for the set of all other novel ORFs (Mann-Whitney U test  $p = 1.8e^{-5}$ ), consistent with the idea that functional ORFs are likely to be more highly expressed than non-functional ORFs (Carvunis et al., 2012; Vakirlis et al., 2020). Of the 90 ORFs that are likely functional based on their G/C-skew, 44 are  $\leq 51$  codons long. Thus, this single indicator of purifying selection has greatly expanded the set of likely

491 functional small ORFs/proteins described for *Mtb*. There may be other constraints that additionally limit codon selection,  
492 especially for regulatory sORFs, such that functional sORFs lack positive G/C skew. Indeed, this is the case for a  
493 phylogenetically conserved set of cysteine-rich regulatory sORFs; cysteine codons that are likely to be essential for sORF  
494 regulatory function (Canestrari et al., 2020) also reduce the G/C-skew (Table S4).

495  
496 Analysis of codon usage for isoform ORFs is not informative due to their overlap with an annotated ORF. Some isoform  
497 ORFs are likely to represent mis-annotations of annotated ORFs. Multiple lines of evidence support this idea: (i) 19% (288)  
498 of isoform start codons are  $\leq 10$  codons from the corresponding annotated start codon (Table S5); this was 3.4-fold more  
499 likely for leaderless isoform ORFs, presumably because they lack a S-D, which likely reduces the accuracy of start codon  
500 prediction by annotation pipelines. (ii) Leadered isoform ORFs that initiate within 10 codons of an annotated ORF have  
501 significantly higher Ribo-RET occupancy than other leadered isoform ORFs (Mann Whitney U Test  $p = 6.3e^{-13}$ ; lower-  
502 confidence ORFs, Ribo-RET occupancy from a single replicate), and are significantly less likely to overlap an annotated  
503 gene whose start codon was identified by Ribo-RET (Fisher's Exact Test  $p = 3e^{-4}$ ). Nonetheless, since most isoform ORFs  
504 start far from an annotated ORF start, we presume that most do not represent mis-annotations; indeed, for 43% (644) of the  
505 isoform ORFs, we also detected the start codon of the overlapping annotated ORF by Ribo-RET. While we expect many  
506 isoform ORFs to be a manifestation of pervasive translation, we speculate that some encode proteins with functions related  
507 to the function of protein encoded by the overlapping, annotated gene, as has been proposed for isoform ORFs in *E. coli*  
508 (Meydan et al., 2019).

## 510 **Conclusions**

511 Our data suggest that the *Mtb* transcriptome is pervasively translated. The unprecedented extent of translation we observe  
512 suggests that much of the translation is biological “noise”, and that most of the translated ORFs are unlikely to be functional.  
513 As ribosome-profiling studies are extended to more diverse species, we anticipate a massive increase in the discovery of  
514 bacterial sORFs/small proteins. Future studies aimed at functional characterization of sORFs/small proteins will require  
515 prioritizing with clear supporting evidence for function from codon usage patterns, phylogenetic conservation (Sberro et al.,  
516 2019), or genetic data.

## 517 MATERIALS AND METHODS

### 519 Strains and plasmids

520 All oligonucleotides used in this study are listed in Table S6. Ribo-seq and Ribo-RET experiments were performed using  
521 the *M. tuberculosis* strain mc<sup>2</sup>7000 (Sambandamurthy et al., 2006). *M. tuberculosis* mc<sup>2</sup>7000 cells were grown in 7H9  
522 medium supplemented with 10% OADC (Oleic acid, Albumin, Dextrose, Catalase), 0.2 % glycerol, 100 µg/ml pantothenic  
523 acid and 0.05 % Tween80 at 37 °C, without shaking, to an OD<sub>600</sub> of ~1.

524  
525 We constructed a shuttle vector, pRV1133C, to allow integration of luciferase or FLAG-tag fusion constructs into *M.*  
526 *smegmatis* mc<sup>2</sup>155 (Snapper et al., 1990) chromosome, with a constitutive promoter driving transcription. pRV1133C was  
527 derived from pMP399, retaining its *oriE* for episomal maintenance in *E. coli*, its integrase and *attP* site for integration at  
528 the L5 *attB* site in mycobacteria, and apramycin resistance (Consaul and Pavelka, 2004). The *hsp60* promoter of pMP399  
529 was replaced by the promoter of the *M. tuberculosis* *Rv1133c* (*metE*) gene (genome coordinates 1,261,811 to 1,261,712  
530 from the minus strand of the *M. tuberculosis* genome, stopping one base pair upstream of the transcription start site;  
531 GenBank accession: AL123456.3). The criterion for selecting *Rv1133c* was its strong constitutive expression assessed by  
532 transcription start site metrics (Shell et al., 2015).

533  
534 A luciferase (NanoLuc) gene amplified from pNL1.1 (Promega, cat no 1001) was cloned downstream of the *Rv1133c*  
535 promoter to generate pGE190. To construct individual reporter fusion plasmids, the entire pGE190 plasmid was amplified  
536 by inverse PCR using Q5 High Fidelity DNA polymerase (NEB) with oligonucleotides TGD4006 and TGD5162. Sequences  
537 corresponding to the 25 bp upstream of, and including the start codons for selected ORFs were PCR-amplified using  
538 oligonucleotide pair TGD5163 and TGD5164, to amplify template oligonucleotides TGD5165-5173, TGD5175, TGD5178-  
539 5186, and TGD5795-5797. PCR products were cloned into the linearized pGE190 using the In-Fusion cloning system  
540 (Takara). The oligonucleotide templates had a “Y” (mixed base “C” or “T”) at the position corresponding to the central  
541 position of the start codon. Clones were sequenced to identify wild-type and mutant constructs, where the central position  
542 of the start codon was a “T” or a “C”, respectively. Plasmid DNA was electroporated into *M. smegmatis* mc<sup>2</sup>155 for  
543 chromosomal integration before assaying luciferase activity.

545 A 3 x FLAG-epitope-tag sequence was integrated into pRV1133C to generate pGE450. To construct individual FLAG-  
546 tagged constructs, the entire pGE450 plasmid was amplified by inverse PCR using Q5 High Fidelity DNA polymerase  
547 (NEB) with oligonucleotide TGD4981 and TGD4982. Sequences from the predicted transcription start site up to the stop  
548 codon for selected ORFs were PCR-amplified using oligonucleotide pairs TGD5208 and TGD5209, TGD5216 and  
549 TGD5217, TGD5241 and TGD5242, or TGD5247 and TGD5248. PCR products were cloned into pGE450 using the In-  
550 Fusion cloning system (Takara). Start codon mutant constructs were made by inverse PCR-amplification of the wild-type  
551 constructs using primers that introduce a start codon mutation (“T” to “C” change at the central position of the start codon;  
552 oligonucleotides TGD5210, TGD5211, TGD5218, TGD5219, TGD5256, TGD5257, TGD5258, and TGD5259). PCR  
553 products were treated with *DpnI* and cloned using the In-Fusion cloning system (Takara). Following sequence confirmation,  
554 plasmid DNA was electroporated into *M. smegmatis* mc<sup>2</sup>155 for chromosomal integration before performing expression  
555 analysis by western blot.

### 556

### 557 **Ribo-seq without drug treatment**

558 10 ml of *M. tuberculosis* (OD<sub>600</sub> of 0.4) was used to inoculate 400 ml of medium and grown to an OD<sub>600</sub> of 1 (2-3 weeks).  
559 Cells were collection by filtration through a 0.22 µm filter. Libraries were prepared for sequencing, and sequencing data  
560 were processed as described previously for *M. smegmatis* (Shell et al., 2015).

### 561

### 562 **RNA-seq**

563 Cell extracts were prepared in parallel to those used for Ribo-seq. RNA was extracted using acid phenol and chloroform  
564 followed by isopropanol precipitation. Ribosomal RNA was removed using the Ribo-Zero Magnetic Kit (Epicentre). RNA  
565 fragmentation, library preparation, sequencing, and data processing were performed as described previously for *M.*  
566 *smegmatis* (Shell et al., 2015).

### 567

### 568 **Ribosome profiling with retapamulin treatment (Ribo-RET)**

569 10 ml of *M. tuberculosis* (OD<sub>600</sub> of 0.4) was used to inoculate 400 ml of medium and grown to an OD<sub>600</sub> of 1 (2-3 weeks).  
570 Cells were treated with retapamulin (Sigma CDS023386) at a final concentration of 0.125 mg/ml for 15 minutes at room  
571 temperature, with occasional manual shaking, and collected by filtration through a 0.22 µm filter. Cells were flash frozen  
572 in liquid nitrogen with 0.7 ml lysis buffer (20 mM Tris pH 8.0, 10 mM MgCl<sub>2</sub>, 100 mM NH<sub>4</sub>Cl, 5 mM CaCl<sub>2</sub>, 0.4 % Triton



573 X100, 0.1 % NP-40, 1 mM chloramphenicol, 100 U/mL DNase I). Frozen cells were milled using a Retsch MM400 mixer  
574 mill for 8 cycles of 3 minutes each at 15 Hz. Milling cups were re-frozen in liquid nitrogen in between each milling cycle.  
575 Cell extracts were thawed and incubated on ice for 30 min. Samples were clarified by centrifugation. Supernatants were  
576 passed twice through 0.22  $\mu$ m filters. 1 mg aliquots of cell extracts were flash-frozen in liquid nitrogen. Monosomes were  
577 isolated by digesting 1 mg of cell extract with 1,500 units of micrococcal nuclease for 1 hour at room temperature on a  
578 rotisserie rotator. The reaction was quenched by adding 2  $\mu$ l 0.5 M EGTA, after which the digest was fractionated through  
579 a 10-50 % sucrose gradient. Fractions from the sucrose gradients were electrophoresed on a 1 % agarose gel with 1 % bleach  
580 to identify ribosomal RNA peaks. Those fractions were selected, pooled, and monosomes isolated by acid  
581 phenol:chloroform extraction and isopropanol precipitation.

582

583 Libraries for sequencing were prepared using a previously described method (Ingolia, 2010). RNA from monosomes was  
584 run on a 15% denaturing gel alongside a 31 nt RNA oligonucleotide to size-select 31 $\pm$ 5 nt fragments. Samples were gel-  
585 extracted in 500  $\mu$ l RNA gel extraction buffer (300 mM NaOAc (pH 5.5), 1 mM EDTA, 0.1 U/mL SUPERase-In RNase  
586 inhibitor) followed by isopropanol precipitation. The samples were dephosphorylated by incubating with 10 U of T4  
587 Polynucleotide Kinase (NEB) for 1 hour at 37  $^{\circ}$ C, before extraction with phenol:chloroform:isoamyl alcohol, and ethanol  
588 precipitation. The dephosphorylated RNAs were ligated to the 3' linker oligonucleotide JW9371 using T4 RNA Ligase 2  
589 (truncated, K227Q) at a 1:4 RNA:linker ratio. The ligation reactions were incubated for 3 hours at 37  $^{\circ}$ C, followed by 20  
590 minutes at 65  $^{\circ}$ C. The reactions were separated on a 15% polyacrylamide denaturing gel with a control RNA oligonucleotide  
591 (JW9370) of the expected size of the ligated product. The RNA-ligation products were excised and extracted in 500  $\mu$ L  
592 RNA extraction buffer and concentrated by ethanol precipitation. Reverse transcription was performed on the RNA samples  
593 using Superscript III (Life Technologies) and oligo JW8875, as described previously (Ingolia, 2010). The reactions were  
594 separated through a 10% polyacrylamide denaturing gel and cDNAs excised and extracted in 500  $\mu$ L DNA extraction buffer  
595 (300 mM NaCl, 10 mM Tris-Cl (pH 8), 1 mM EDTA). Reverse-transcribed cDNA was circularized using CircLigase, and  
596 PCR-amplified as described previously (Ingolia, 2010). Between 4 and 9 cycles of PCR were performed using Phusion High  
597 Fidelity DNA Polymerase, JW8835 as the standard forward primer and JW3249, 3250, 8876 or 8877, corresponding to  
598 Illumina index numbers 1, 2, 34 or 39 respectively, as the reverse primer. Samples were separated through an 8%  
599 polyacrylamide acrylamide gel. DNAs of the appropriate length (longer than the control adapter band) were excised from

600 the gel and extracted in 500  $\mu$ L of DNA extraction buffer. DNAs were concentrated by isopropanol precipitation. Samples  
601 were quantified and subject to DNA sequence analysis on a NextSeq instrument.

### 603 **Inferring ORF positions from Ribo-RET data**

604 Sequencing reads from Ribo-RET datasets were trimmed to remove adapter sequences using a custom python script that  
605 trimmed reads up to the first instance of CTGTAGGCACC, keeping trimmed reads in the length range 20-44 nt. Trimmed  
606 sequence reads were aligned to the reference genome and separately to a reverse-complemented copy of the reference  
607 genome, using Rockhopper (McClure et al., 2013). The positions of read 3' ends were determined from the resultant .sam  
608 files, and used to determine coverage on each strand at each genome position. Coverage values were set to 0 for regions  
609 encompassing all annotated non-coding genes, and the 50 nt regions downstream of the 1,285 TSSs associated with an RUG  
610 (i.e. the first 50 nt of all predicted leaderless ORFs) (Cortes et al., 2013; Shell et al., 2015). Read counts were then normalized  
611 to total read count as reads per million (RPM).

612  
613 Every genome coordinate on each strand was considered as a possible IERF. To be selected as an IERF, a position required  
614 a minimum of 5.5 RPM coverage (equivalent to 20 sequence reads in the first replicate dataset), with at least 10-fold higher  
615 coverage than the average coverage in the 101 nt region centered on the coordinate being considered, and equal or higher  
616 coverage than every position in the 21 nt region centered on the coordinate being considered. For high-confidence ORF  
617 calls, all criteria had to be met in both replicate datasets. IERFs were inferred to represent an ORF if the IERF position was  
618 15 nt downstream of a TTG, 14-18 nt downstream of an ATG, or 14-18 nt downstream of a GTG. These trinucleotide  
619 sequences and distances were selected based on a >1.4-fold enrichment upstream of IERFs (Figure 2B). In a small number  
620 of cases, two IERFs were associated with the same start codon; this only occurred in cases where the two IERFs had identical  
621 Ribo-RET sequence coverage. This double-matching means that the number of IERFs is slightly higher than the number of  
622 identified ORFs.

### 624 **Calculating False Discovery Rates for ORF prediction from Ribo-RET data**

625 The likelihood of randomly selecting a genome coordinate with an associated start codon sequence (as defined above for  
626 IERFs) was estimated by selecting 100,000 random genome coordinates and determining the fraction, "R", that would be  
627 associated with a start codon. The set of IERFs contains a number of true positives (i.e. corresponding to a genuine start

628 codon), and a number of false positives. We assume that true positive IERFs are all associated with a start codon using the  
629 parameters described above for calling ORFs. We assume that false positive IERFs are associated with a start codon at the  
630 same frequency as random genome coordinates, i.e.  $R$ . Since we know how many IERFs were not associated with a start  
631 codon, we can use this number to estimate how many false positive IERFs were associated with a start codon by chance.  
632 With the total number of IERFs as “ $I$ ” and the total number of identified ORFs as “ $O$ ”, the FDR for ORF calls is estimated  
633 by:

$$(100 * (I - O) * (R / (1 - R))) / O$$

636  
637 To estimate the distribution of false positive IERFs between annotated, isoform, and novel ORFs, we determined the relative  
638 proportion of each class of ORF from the set of randomly selected genome coordinates that were associated with a start  
639 codon by chance.

#### 641 **Selection of Mock ORFs**

642 As a control for potential artifacts of DNA sequence on Ribo-seq coverage we selected 1,000 mock ORFs: sequences that  
643 begin at an ATG or GTG and extend to the first in-frame stop codon. Mock ORF stop codons do not match those of  
644 previously annotated genes or novel genes identified from Ribo-RET data. To ensure that mock ORFs are in transcribed  
645 regions, we required non-zero RNA-seq coverage at the first position of each mock ORF. For simplicity, mock ORFs were  
646 only selected on the forward strand of the genome.

#### 648 **RNA folding prediction**

649 The sequence from -40 to +20 relative to each start codon, or for 500 x 60 nt sequences randomly selected from the *M.*  
650 *tuberculosis* genome, were selected for prediction of the free energy of the predicted minimum free energy structure using  
651 a local installation of ViennaRNA Package tool RNAfold, version 2.4.14, using default settings (Lorenz et al., 2011).

#### 653 **Determining normalized sequence read coverage from Ribo-seq and RNA-seq data**

654 Library construction for Ribo-seq and RNA-seq included polyadenylation of RNA fragments, and sequence reads were  
655 trimmed at their 3' ends, immediately upstream of the first instance of “AAA” before aligning to the reference genome;

656 hence, it is impossible for a trimmed sequence read to end with an “A”. This likely explains why we observed apparent  
657 differences in ribosome occupancy in Ribo-seq data precisely at start and stop codons for all classes of ORF (e.g. Figure 1),  
658 since these codons are strongly enriched for specific bases. We note that the same patterns were observed for RNA-seq data  
659 (Figure 4 - Figure Supplement 1B-D; RNA-seq library construction included a polyadenylation step, and reads were  
660 trimmed and mapped identically to those from Ribo-seq datasets), and for mock ORFs in Ribo-seq data (Figure 4 - Figure  
661 Supplement 1A).

662  
663 Sequence reads were aligned to the reference genome (NCBI Reference Sequence: NC\_000962.3) and separately to a  
664 reverse-complemented copy of the reference genome, using Rockhopper, version 2.0.3 (McClure et al., 2013). The positions  
665 of read 3’ ends were determined from the resultant .sam files, and used to determine coverage on each strand at each genome  
666 position, normalized to total read count as reads per million (RPM).

### 667 668 **Generating metagene plots**

669 Metagene plots (i.e. Figures 1A-D, 2A, 4B-D, S1, S2, S5A-D, S6D-F) used normalized coverage values (RPM) for Ribo-  
670 seq, RNA-seq, or Ribo-RET data, calculated as described above. Coverage scores were selected for regions from -50 to  
671 +100 relative to start codons or TSSs, or -100 to +50 relative to stop codons. Coverage RPM values were further normalized  
672 to the highest value in the selected range. For metagene plots of leadered, previously annotated ORFs (Figures 1A, 2A, S2),  
673 previously annotated genes were excluded if they were pseudogenes, non-coding, or had a TSS within 5 nt upstream of the  
674 start codon. For the metagene plot of TSSs not associated with leaderless ORFs, TSSs were selected from published reports  
675 (Cortes et al., 2013; Shell et al., 2015) if they were located at least 6 nt upstream of a previously annotated start codon.

### 676 677 **Calculating relative ribosome density per transcript for ORFs and transcript regions**

678 We selected three sets of genomic regions: (i) all annotated ORFs identified either by Ribo-RET (higher-confidence and  
679 lower-confidence) or from leaderless analysis, (ii) all novel ORFs identified either by Ribo-RET (higher-confidence and  
680 lower-confidence) or from leaderless analysis, and (iii) a set of 1,854 control transcript regions, described below. For (ii),  
681 we removed regions of ORFs that are not at least 30 nt from an annotated gene on the same strand; in many cases this led  
682 to exclusion of the ORF or trimming one or both ends of the region to be analyzed. We also excluded any remaining ORF  
683 or ORF region <50 nt in length. A set of control transcript regions, intended to comprise mostly non-coding RNA, was

684 selected by identifying transcription start sites (Cortes et al., 2013; Shell et al., 2015) >5 nt upstream of an RTG trinucleotide  
685 sequence. We then selected the first 50 nt of the associated transcribed regions. These control regions were excluded if they  
686 are not at least 30 nt from an annotated gene on the same strand, or if they overlap partially or completely a novel or isoform  
687 ORF identified in this study.

688  
689 For each category of region, (i), (ii), and (iii), described above, we calculated the normalized sequence read coverage (RPM)  
690 from two replicates each of RNA-seq and Ribo-seq data, aligning only the sequence read 3' ends (see section titled  
691 "Determining normalized sequence read coverage from Ribo-seq and RNA-seq data"). We excluded 7 of the regions in  
692 category (iii) that had zero RNA-seq coverage in both replicates. Data in Figure 5A and Figure 5 - Figure Supplement 1A,  
693 show the sequence read coverage normalized to the length of each region analyzed. To calculate the relative ribosome  
694 occupancy per transcript (Figure 5B), we first averaged the RNA-seq and Ribo-seq normalized coverage values from each  
695 of the two replicate datasets for each region analyzed. We then calculated the ratio of the Ribo-seq value to the RNA-seq  
696 value.

#### 697 698 **Analysis of G/C usage within codons**

699 For novel ORFs identified using the first replicate of Ribo-RET data, including ORFs identified in both replicates, we first  
700 trimmed the start and stop codons. We then trimmed any region of the remaining ORF that overlaps a previously annotated  
701 gene; in many cases this removed the entire ORF from the analysis, leaving only complete codons. For the remaining  
702 sequences we scored the first, second or third position of all codons for the presence of a G or C. The G/C-skew was  
703 calculated as the ratio of the sum of G/C bases at the third codon position to that at the second codon position. Statistical  
704 comparisons were performed using a Fisher's exact test comparing G/C base count at the second and third positions; tests  
705 were one-tailed or two-tailed as indicated, with the null hypothesis for one-tailed tests being that the G/C base count at the  
706 third codon position was not higher than that at the second codon position. Values plotted in Figure 8 represent the sum of  
707 values for each individual ORF, or the equivalent number for the annotated ORFs we identified by Ribo-RET (we did not  
708 trim these except for start and stop codons).

#### 709 710 **Analysis of G/C usage within codons for predicted regulatory cysteine-rich sORFs**

711 We examined the G/C-skew of 6 ORFs that we predict regulate expression of the downstream gene in response to cysteine  
712 availability, based on their conservation with regulatory sORFs in *M. smegmatis* (Canestrari et al., 2020). Strikingly, only  
713 one of these ORFs individually has significantly positive G/C-skew (Table S4; Fisher's exact test  $p < 0.05$ ). Moreover, as  
714 a group, the six sORFs do not have significantly positive G/C-skew (Table S4; Fisher's exact test  $p = 0.13$ ;  $n = 145$  codons).  
715 We repeated this analysis after removing the cysteine codons from the sORFs, reasoning that cysteine codons have a neutral  
716 or negative effect on G/C-skew, and that the presence of cysteine codons is likely essential for the regulatory activity of the  
717 sORFs. Removing the cysteine codons increased G/C-skew for all ORFs; in two cases, the G/C-skew of the ORFs with  
718 cysteine codons removed is significantly positive (Table S4; Fisher's exact test  $p < 0.05$ ). Moreover, as a group, the six  
719 ORFs with cysteine codons removed have significantly positive G/C-skew (Table S4; Fisher's exact test  $p = 1.5e^{-4}$ ;  $n = 120$   
720 codons).

721

## 722 **Analysis of trinucleotide sequence content upstream of IERFs**

723 The frequency of each trinucleotide was determined for the 50 nt upstream of all IERFs. For each trinucleotide sequence,  
724 the frequencies at positions -50 to -41 were averaged (mean), and frequencies at all other positions were normalized to this  
725 averaged number. The frequency of AGG and GGA trinucleotide sequences upstream of putative start codons was  
726 determined similarly, with the control region used for normalization located at positions -35 to -26 relative to the start  
727 codons.

728

## 729 **Luciferase reporter assays**

730 *M. smegmatis* mc<sup>2</sup>155 strains with integrated luciferase reporter constructs were grown in TSB with Tween80 overnight at  
731 37 °C to an OD<sub>600</sub> of ~1.0. 10 µl of Nano-Glo Luciferase Assay Reagent was mixed with 10 µl of cell culture. Data were  
732 normalized to the corresponding OD<sub>600</sub> value. Assays were performed in triplicate (biological replicates).

733

## 734 **Western blots**

735 *M. smegmatis* MC<sup>2</sup>155 strains with integrated FLAG-tagged constructs were grown in TSB with Tween overnight at 37 °C  
736 to an OD<sub>600</sub> of ~1.0. Cells were harvested by centrifugation and resuspended in 1 x NuPage LDS sample buffer (Invitrogen)  
737 + 5 mM sodium metabisulfite. Samples were heated at 95 °C for 10 min before loading onto a 4-12% gradient Bis-Tris  
738 mini-gel (Invitrogen). After separation, proteins were transferred to a nitrocellulose membrane (Life Technologies) or a

739 PVDF membrane (Thermo Scientific). Membranes were probed with a monoclonal mouse anti-FLAG antibody (M2;  
740 Sigma). Secondary antibody and detection reagents were obtained from Lumigen (ECL plus kit) and used according to the  
741 manufacturer's instructions.

742

### 743 **Integrated Genome Browser**

744 All ribosome profiling and Ribo-RET data, and identified ORFs are available for visualization on our interactive genome  
745 browser (Shell et al., 2015): <http://mtb.wadsworth.org/>

746

### 747 **Mass Spectrometry**

748 5 ml of *Mtb* (OD<sub>600</sub> of 0.4) was used to inoculate 200 ml of medium and grown to an OD<sub>600</sub> of 1.175. Cells were collection  
749 by filtration through a 0.22 µm filter. Cells were flash frozen in liquid nitrogen with 0.6 ml lysis buffer (20 mM Tris pH  
750 8.0, 10 mM MgCl<sub>2</sub>, 100 mM NH<sub>4</sub>Cl, 5 mM CaCl<sub>2</sub>, 0.4 % Triton X100, 0.1 % NP-40, 1 mM chloramphenicol, 100 U/mL  
751 DNase I). Frozen cells were milled using a Retsch MM400 mixer mill for 8 cycles of 3 minutes each at 15 Hz. Milling cups  
752 were re-frozen in liquid nitrogen between each milling cycle. Cell extracts were thawed and incubated on ice for 30 min.  
753 Samples were clarified by centrifugation. Supernatants were passed twice through 0.22 µm filters. Samples were prepared  
754 for MS analysis from 100 µg aliquots of *Mtb* cytosolic lysate in each of six different ways, with the numbers listed below  
755 matching those in Tables S1 and S3:

756

757 1. Protein was precipitated by addition of acetonitrile at a ratio of 2:1, placed on ice for 20 minutes, then clarified by  
758 centrifugation for 10 minutes at 12,000 x g. The supernatant (enriched for small proteins) was decanted into two aliquots  
759 and dried using a speedvac (Thermo). One aliquot was resuspended and using a 10 mg HLB Solid-phase extraction cartridge  
760 (Waters) according to manufacturer's instructions, and dried prior to direct analysis by nano-UHPLC-MS/MS. The second  
761 aliquot was used in method (2), as described below.

762

763 2. The remaining aliquot from (1) was resuspended in 100 µl Tri-ethyl ammonium bicarbonate TEAB (Sigma) and subjected  
764 to dimethyl labeling of Lys and N-termini to increase the mass and reduce the charge, and thereby increase detectability of  
765 small proteins (Boersema et al., 2009; Yan et al., 2020). The sample was desalted as above and dried prior to LC-MS/MS.

766



767 3. Protein was denatured by addition of powdered urea (Alfa Aesar) to 8 M final concentration. The sample was subjected  
768 to centrifugal filtration through a 10K Amicon filter similar to that employed in Filter Aided Sample Prep (FASP)  
769 proteomics (Wiśniewski et al., 2009), except the sample flow-through containing small molecular weight proteins, not the  
770 retentate, was retained and split into two aliquots. One aliquot was desalted and dried prior to direct analysis by nano-  
771 UHPLC-MS/MS. The second aliquot was used in method (4), as described below.

772  
773 4. The remaining aliquot from (3) was diluted until the urea concentration was <2 M, before being chemically reduced and  
774 alkylated (Yan et al., 2020). To reduce the size of large and hydrophobic proteins, the sample was digested with 1 µg of  
775 sequencing grade trypsin (Promega) for 6 hours at 37 °C. Following digestion, the sample was quenched by addition of  
776 formic acid, desalted and dried. Samples were resuspended in 20µl of 0.2% formic acid in water and subjected to nano-  
777 UHPLC-MS/MS analysis on a Q-Exactive instrument (Thermo) (Bosserman et al., 2017; Canestrari et al., 2020).

778  
779 5. Protein was denatured by addition of powdered urea (Alfa Aesar) to 8 M final concentration. The sample was subjected  
780 to centrifugal filtration through a 3K Amicon filter, retaining the small molecular weight protein flow-through. The sample  
781 was desalted and dried prior to direct analysis by nano-UHPLC-MS/MS.

782  
783 6. A total-protein digest was performed using an in-solution trypsin digestion procedure as a potential source for small  
784 proteins not enriched using the approaches described above (Champion et al., 2003).

785  
786 RAW files were converted to mgf (mascot generic format) using MS-Convert (Adusumilli and Mallick, 2017). Spectrum  
787 mass matching was performed using the Paragon Algorithm with feature sets as appropriate for each sample (e.g.  
788 demethylation, trypsin, no-digest) in thorough mode (Champion et al., 2012; Shilov et al., 2007). A custom small protein,  
789 and leaderless FASTA constructed from the RiboSeq data was used for database search. False discovery rates were  
790 determined using the target-decoy strategy as in (Elias and Gygi, 2007). Proteins identified using this method were subjected  
791 to manual spectral interpretation to validate peptide spectral matches in particular for b,y-ion consistency His, Phe,  
792 immonium ions and internal fragments to Pro residues with high intensity. Selected small proteins and small protein derived  
793 peptides from high-and medium observed abundance were chemically synthesized (Genscript) and subjected to LC-MS/MS

794 as above. Synthetic small protein spectra were compared to the empirical-matched small proteins using the peptide spectral  
795 annotator (Brademan et al., 2019).

796 **ACKNOWLEDGEMENTS**

797  
798 We thank Mike Palumbo and Dan Muller for assistance setting up the interactive genome browser  
799 (<http://mtb.wadsworth.org/>), Gabriele Baniulyte, Yunlong Li, and Yong Yang for technical support, David Grainger for  
800 comments on the manuscript, and Anne-Ruxandra Carvunis for helpful discussions. We thank the Wadsworth Center  
801 Applied Genomic Technologies, Bioinformatics, and Media Core Facilities, and Dr. Boggess in the Notre Dame MS and  
802 Proteomics Facility. This work was supported by National Institutes of Health grants R21AI117158 and R21AI119427  
803 (JTW, KMD, TAG) and R01GM139277 (JTW, KMD, TAG, MMC).

804 **DATA ACCESSIBILITY**

805

806 Raw Illumina sequencing data are available from the ArrayExpress and European Nucleotide Archive repositories with  
807 accession numbers E-MTAB-8039 and E-MTAB-10695. Raw mass spectrometry data are available through MassIVE, with  
808 exchange #MSV000087541. Python code is available at [https://github.com/wade-lab/Mtb\\_Ribo-RET](https://github.com/wade-lab/Mtb_Ribo-RET). Reviewers can access  
809 the raw mass spectrometry data at <ftp://MSV000087541@massive.ucsd.edu>, password: sproteinTB

810 **AUTHOR CONTRIBUTIONS**

811

812 Conceptualization, JTW, KMD, and TAG.

813 Methodology, AJW.

814 Investigation, CS, JGC, AJW, MMC, and JTW.

815 Writing – Original Draft, JTW

816 Writing – Review & Editing, KMD, TAG, and MMC.

817 Funding Acquisition, KMD, TAG, JTW, and MMC.

818 Supervision, JTW, TAG, and KMD.

819 **DECLARATION OF INTERESTS**

820

821 The authors declare no competing interests.

822 **REFERENCES**

823

824 Adusumilli, R., and Mallick, P. (2017). Data Conversion with ProteoWizard msConvert. *Methods Mol Biol* *1550*, 339–368.

825 Baez, W.D., Roy, B., McNutt, Z.A., Shatoff, E.A., Chen, S., Bundschuh, R., and Fredrick, K. (2019). Global analysis of  
826 protein synthesis in *Flavobacterium johnsoniae* reveals the use of Kozak-like sequences in diverse bacteria. *Nucleic Acids*  
827 *Res* *47*, 10477–10488.

828 Beck, H.J., and Moll, I. (2018). Leaderless mRNAs in the Spotlight: Ancient but Not Outdated! *Microbiol Spectr* *6*.

829 Besemer, J., and Borodovsky, M. (2005). GeneMark: web software for gene finding in prokaryotes, eukaryotes and viruses.  
830 *Nucleic Acids Res.* *33*, W451-454.

831 Bibb, M.J., Findlay, P.R., and Johnson, M.W. (1984). The relationship between base composition and codon usage in  
832 bacterial genes and its use for the simple and reliable identification of protein-coding sequences. *Gene* *30*, 157–166.

833 Blevins, W.R., Ruiz-Orera, J., Messeguer, X., Blasco-Moreno, B., Villanueva-Cañas, J.L., Espinar, L., Díez, J., Carey, L.B.,  
834 and Albà, M.M. (2021). Uncovering de novo gene birth in yeast using deep transcriptomics. *Nat Commun* *12*, 604.

835 Boersema, P.J., Raijmakers, R., Lemeer, S., Mohammed, S., and Heck, A.J.R. (2009). Multiplex peptide stable isotope  
836 dimethyl labeling for quantitative proteomics. *Nat Protoc* *4*, 484–494.

837 Bosserman, R.E., Nguyen, T.T., Sanchez, K.G., Chirakos, A.E., Ferrell, M.J., Thompson, C.R., Champion, M.M.,  
838 Abramovitch, R.B., and Champion, P.A. (2017). WhiB6 regulation of ESX-1 gene expression is controlled by a negative  
839 feedback loop in *Mycobacterium marinum*. *Proc Natl Acad Sci U S A* *114*, E10772–E10781.

840 Brademan, D.R., Riley, N.M., Kwiecien, N.W., and Coon, J.J. (2019). Interactive Peptide Spectral Annotator: A Versatile  
841 Web-based Tool for Proteomic Applications. *Mol Cell Proteomics* *18*, S193–S201.

842 Burge, C.B., and Karlin, S. (1998). Finding the genes in genomic DNA. *Curr. Opin. Struct. Biol.* *8*, 346–354.



- 843 Canestrari, J.G., Lasek-Nesselquist, E., Upadhyay, A., Rofaeil, M., Champion, M.M., Wade, J.T., Derbyshire, K.M., and  
844 Gray, T.A. (2020). Polycysteine-encoding leaderless short ORFs function as cysteine-responsive attenuators of operonic  
845 gene expression in mycobacteria. *Mol Microbiol* *114*, 93–108.
- 846 Carvunis, A.-R., Rolland, T., Wapinski, I., Calderwood, M.A., Yildirim, M.A., Simonis, N., Charloteaux, B., Hidalgo, C.A.,  
847 Barbette, J., Santhanam, B., et al. (2012). Proto-genes and de novo gene birth. *Nature* *487*, 370–374.
- 848 Champion, M.M., Campbell, C.S., Siegele, D.A., Russell, D.H., and Hu, J.C. (2003). Proteome analysis of *Escherichia coli*  
849 K-12 by two-dimensional native-state chromatography and MALDI-MS. *Mol Microbiol* *47*, 383–396.
- 850 Champion, M.M., Williams, E.A., Kennedy, G.M., and Champion, P.A.D. (2012). Direct detection of bacterial protein  
851 secretion using whole colony proteomics. *Mol Cell Proteomics* *11*, 596–604.
- 852 Consaul, S.A., and Pavelka, M.S. (2004). Use of a novel allele of the *Escherichia coli* aacC4 aminoglycoside resistance  
853 gene as a genetic marker in mycobacteria. *FEMS Microbiol. Lett.* *234*, 297–301.
- 854 Cortes, T., Schubert, O.T., Rose, G., Arnvig, K.B., Comas, I., Aebersold, R., and Young, D.B. (2013). Genome-wide  
855 Mapping of Transcriptional Start Sites Defines an Extensive Leaderless Transcriptome in *Mycobacterium tuberculosis*. *Cell*  
856 *Reports* *5*, 1121–1131.
- 857 Del Campo, C., Bartholomäus, A., Fedyunin, I., and Ignatova, Z. (2015). Secondary Structure across the Bacterial  
858 Transcriptome Reveals Versatile Roles in mRNA Regulation and Function. *PLoS Genet.* *11*, e1005613.
- 859 Delcher, A.L., Bratke, K.A., Powers, E.C., and Salzberg, S.L. (2007). Identifying bacterial genes and endosymbiont DNA  
860 with Glimmer. *Bioinformatics* *23*, 673–679.
- 861 Dingwall, C., Lomonosoff, G.P., and Laskey, R.A. (1981). High sequence specificity of micrococcal nuclease. *Nucleic*  
862 *Acids Res.* *9*, 2659–2673.
- 863 Elias, J.E., and Gygi, S.P. (2007). Target-decoy search strategy for increased confidence in large-scale protein identifications  
864 by mass spectrometry. *Nat Methods* *4*, 207–214.
- 865 Gvozdjak, A., and Samanta, M.P. (2020). Genes Preferring Non-AUG Start Codons in Bacteria. *ArXiv:2008.10758 [q-Bio]*.

- 866 Hecht, A., Glasgow, J., Jaschke, P.R., Bawazer, L.A., Munson, M.S., Cochran, J.R., Endy, D., and Salit, M. (2017).  
867 Measurements of translation initiation from all 64 codons in E. coli. *Nucleic Acids Research* *45*, 3615–3626.
- 868 Hyatt, D., Chen, G.-L., Locascio, P.F., Land, M.L., Larimer, F.W., and Hauser, L.J. (2010). Prodigal: prokaryotic gene  
869 recognition and translation initiation site identification. *BMC Bioinformatics* *11*, 119.
- 870 Ingolia, N.T. (2010). Genome-wide translational profiling by ribosome footprinting. *Methods Enzymol.* *470*, 119–142.
- 871 Ingolia, N.T., Ghaemmaghami, S., Newman, J.R., and Weissman, J.S. (2009). Genome-wide analysis in vivo of translation  
872 with nucleotide resolution using ribosome profiling. *Science* *324*, 218–223.
- 873 Ingolia, N.T., Brar, G.A., Stern-Ginossar, N., Harris, M.S., Talhouarne, G.J.S., Jackson, S.E., Wills, M.R., and Weissman,  
874 J.S. (2014). Ribosome profiling reveals pervasive translation outside of annotated protein-coding genes. *Cell Rep* *8*, 1365–  
875 1379.
- 876 Ji, Z., Song, R., Huang, H., Regev, A., and Struhl, K. (2016). Transcriptome-scale RNase-footprinting of RNA-protein  
877 complexes. *Nat. Biotechnol.* *34*, 410–413.
- 878 Keeling, D.M., Garza, P., Nartey, C.M., and Carvunis, A.-R. (2019). The meanings of “function” in biology and the  
879 problematic case of de novo gene emergence. *Elife* *8*.
- 880 Laursen, B.S., Sørensen, H.P., Mortensen, K.K., and Sperling-Petersen, H.U. (2005). Initiation of protein synthesis in  
881 bacteria. *Microbiol Mol Biol Rev* *69*, 101–123.
- 882 Lomsadze, A., Gemayel, K., Tang, S., and Borodovsky, M. (2018). Modeling leaderless transcription and atypical genes  
883 results in more accurate gene prediction in prokaryotes. *Genome Res.* *28*, 1079–1089.
- 884 Lorenz, R., Bernhart, S.H., Höner Zu Siederdisen, C., Tafer, H., Flamm, C., Stadler, P.F., and Hofacker, I.L. (2011).  
885 ViennaRNA Package 2.0. *Algorithms Mol Biol* *6*, 26.
- 886 Lu, T.-C., Leu, J.-Y., and Lin, W.-C. (2017). A Comprehensive Analysis of Transcript-Supported De Novo Genes in  
887 *Saccharomyces sensu stricto* Yeasts. *Mol Biol Evol* *34*, 2823–2838.

- 888 Lybecker, M., Bilusic, I., and Raghavan, R. (2014). Pervasive transcription: detecting functional RNAs in bacteria.  
889 *Transcription* 5, e944039.
- 890 McClure, R., Balasubramanian, D., Sun, Y., Bobrovskyy, M., Sumbly, P., Genco, C.A., Vanderpool, C.K., and Tjaden, B.  
891 (2013). Computational analysis of bacterial RNA-Seq data. *Nucleic Acids Res.* 41, e140.
- 892 Meydan, S., Vázquez-Laslop, N., and Mankin, A.S. (2018). Genes within Genes in Bacterial Genomes. *Microbiol Spectr* 6.
- 893 Meydan, S., Marks, J., Klepacki, D., Sharma, V., Baranov, P.V., Firth, A.E., Margus, T., Kefi, A., Vázquez-Laslop, N., and  
894 Mankin, A.S. (2019). Retapamulin-Assisted Ribosome Profiling Reveals the Alternative Bacterial Proteome. *Mol. Cell*.
- 895 Moll, I., Grill, S., Gualerzi, C.O., and Bläsi, U. (2002). Leaderless mRNAs in bacteria: surprises in ribosomal recruitment  
896 and translational control. *Mol Microbiol* 43, 239–246.
- 897 Oh, E., Becker, A.H., Sandikci, A., Huber, D., Chaba, R., Gloge, F., Nichols, R.J., Typas, A., Gross, C.A., Kramer, G., et  
898 al. (2011). Selective ribosome profiling reveals the cotranslational chaperone action of trigger factor in vivo. *Cell* 147,  
899 1295–1308.
- 900 Orr, M.W., Mao, Y., Storz, G., and Qian, S.-B. (2020). Alternative ORFs and small ORFs: shedding light on the dark  
901 proteome. *Nucleic Acids Research* 48, 1029–1042.
- 902 Romero, D.A., Hasan, A.H., Lin, Y.-F., Kime, L., Ruiz-Larrabeiti, O., Urem, M., Bucca, G., Mamanova, L., Laing, E.E.,  
903 van Wezel, G.P., et al. (2014). A comparison of key aspects of gene regulation in *Streptomyces coelicolor* and *Escherichia*  
904 *coli* using nucleotide-resolution transcription maps produced in parallel by global and differential RNA sequencing. *Mol*  
905 *Microbiol.*
- 906 Ruiz-Orera, J., Verdaguer-Grau, P., Villanueva-Cañas, J.L., Messeguer, X., and Albà, M.M. (2018). Translation of neutrally  
907 evolving peptides provides a basis for de novo gene evolution. *Nat Ecol Evol* 2, 890–896.
- 908 Saito, K., Green, R., and Buskirk, A.R. (2020). Translational initiation in *E. coli* occurs at the correct sites genome-wide in  
909 the absence of mRNA-rRNA base-pairing. *Elife* 9.

- 910 Sambandamurthy, V.K., Derrick, S.C., Hsu, T., Chen, B., Larsen, M.H., Jalapathy, K.V., Chen, M., Kim, J., Porcelli, S.A.,  
911 Chan, J., et al. (2006). Mycobacterium tuberculosis DeltaRD1 DeltapanCD: a safe and limited replicating mutant strain that  
912 protects immunocompetent and immunocompromised mice against experimental tuberculosis. *Vaccine* 24, 6309–6320.
- 913 Sawyer, E.B., Phelan, J.E., Clark, T.G., and Cortes, T. (2021). A snapshot of translation in Mycobacterium tuberculosis  
914 during exponential growth and nutrient starvation revealed by ribosome profiling. *Cell Rep* 34, 108695.
- 915 Sberro, H., Fremin, B.J., Zlitni, S., Edfors, F., Greenfield, N., Snyder, M.P., Pavlopoulos, G.A., Kyrpides, N.C., and Bhatt,  
916 A.S. (2019). Large-Scale Analyses of Human Microbiomes Reveal Thousands of Small, Novel Genes. *Cell* 178, 1245-  
917 1259.e14.
- 918 Shell, S.S., Wang, J., Lapierre, P., Mir, M., Chase, M.R., Pyle, M.M., Gawande, R., Ahmad, R., Sarracino, D.A., Ioerger,  
919 T.R., et al. (2015). Leaderless Transcripts and Small Proteins Are Common Features of the Mycobacterial Translational  
920 Landscape. *PLoS Genet.* 11, e1005641.
- 921 Shilov, I.V., Seymour, S.L., Patel, A.A., Loboda, A., Tang, W.H., Keating, S.P., Hunter, C.L., Nuwaysir, L.M., and  
922 Schaeffer, D.A. (2007). The Paragon Algorithm, a next generation search engine that uses sequence temperature values and  
923 feature probabilities to identify peptides from tandem mass spectra. *Mol Cell Proteomics* 6, 1638–1655.
- 924 Snapper, S.B., Melton, R.E., Mustafa, S., Kieser, T., and Jacobs, W.R. (1990). Isolation and characterization of efficient  
925 plasmid transformation mutants of Mycobacterium smegmatis. *Mol. Microbiol.* 4, 1911–1919.
- 926 Storz, G., Wolf, Y.I., and Ramamurthi, K.S. (2014). Small proteins can no longer be ignored. *Annu Rev Biochem* 83, 753–  
927 777.
- 928 Tang, W.H., Shilov, I.V., and Seymour, S.L. (2008). Nonlinear fitting method for determining local false discovery rates  
929 from decoy database searches. *J Proteome Res* 7, 3661–3667.
- 930 Vakirlis, N., Hebert, A.S., Ofulente, D.A., Achaz, G., Hittinger, C.T., Fischer, G., Coon, J.J., and Lafontaine, I. (2018). A  
931 Molecular Portrait of De Novo Genes in Yeasts. *Mol Biol Evol* 35, 631–645.

- 932 Vakirlis, N., Acar, O., Hsu, B., Castilho Coelho, N., Van Oss, S.B., Wacholder, A., Medetgul-Ernar, K., Bowman, R.W.,  
933 Hines, C.P., Iannotta, J., et al. (2020). De novo emergence of adaptive membrane proteins from thymine-rich genomic  
934 sequences. *Nat Commun* *11*, 781.
- 935 Van Oss, S.B., and Carvunis, A.-R. (2019). De novo gene birth. *PLoS Genet* *15*, e1008160.
- 936 VanOrsdel, C.E., Kelly, J.P., Burke, B.N., Lein, C.D., Oufiero, C.E., Sanchez, J.F., Wimmers, L.E., Hearn, D.J., Abuikhdair,  
937 F.J., Barnhart, K.R., et al. (2018). Identifying New Small Proteins in *Escherichia coli*. *Proteomics* *18*, e1700064.
- 938 Vellanoweth, R.L., and Rabinowitz, J.C. (1992). The influence of ribosome-binding-site elements on translational efficiency  
939 in *Bacillus subtilis* and *Escherichia coli* in vivo. *Mol Microbiol* *6*, 1105–1114.
- 940 Wacholder, A., Acar, O., and Carvunis, A.-R. (2021). A reference translome map reveals two modes of protein evolution.
- 941 Wade, J.T., and Grainger, D.C. (2014). Pervasive transcription: illuminating the dark matter of bacterial transcriptomes. *Nat*  
942 *Rev Micro* *12*, 647–653.
- 943 Weaver, J., Mohammad, F., Buskirk, A.R., and Storz, G. (2019). Identifying Small Proteins by Ribosome Profiling with  
944 Stalled Initiation Complexes. *MBio* *10*.
- 945 Wiśniewski, J.R., Zougman, A., Nagaraj, N., and Mann, M. (2009). Universal sample preparation method for proteome  
946 analysis. *Nat Methods* *6*, 359–362.
- 947 Woolstenhulme, C.J., Guydosh, N.R., Green, R., and Buskirk, A.R. (2015). High-precision analysis of translational pausing  
948 by ribosome profiling in bacteria lacking EFP. *Cell Rep* *11*, 13–21.
- 949 Yan, X., Sun, L., Dovichi, N.J., and Champion, M.M. (2020). Minimal deuterium isotope effects in quantitation of dimethyl-  
950 labeled complex proteomes analyzed with capillary zone electrophoresis/mass spectrometry. *Electrophoresis* *41*, 1374–  
951 1378.
- 952 Yomtovian, I., Teerakulkittipong, N., Lee, B., Moul, J., and Unger, R. (2010). Composition bias and the origin of ORFan  
953 genes. *Bioinformatics* *26*, 996–999.

955 **SUPPLEMENTARY TABLES**

956

957 **Table S1. List of putative leaderless ORFs.**

958 **Table S2. List of IERFs.**

959 **Table S3. List of ORFs identified by Ribo-RET.**

960 **Table S4. Analysis of G/C skew for cys-rich regulatory ORFs.**

961 **Table S5. Analysis of isoform ORFs and their position relative to overlapping annotated ORFs.**

962 **Table S6. List of oligonucleotides used in this study.**
